# Supplementary material
Source: PubMed Central journal article supplement (PMC7641300)
Supplement: ehp6652.s001.acco.pdf [file ehp6652.s001.acco.pdf]

**Note to readers with disabilities:** *EHP* strives to ensure that all journal content is accessible to all readers. However, some figures and Supplemental Material published in *EHP* articles may not conform to [508 standards](#) due to the complexity of the information being presented. If you need assistance accessing journal content, please contact [ehp508@niehs.nih.gov](mailto:ehp508@niehs.nih.gov). Our staff will work with you to assess and meet your accessibility needs within 3 working days.

### **Supplemental Material**

#### **Developmental Neurotoxicity of the Harmful Algal Bloom Toxin Domoic Acid: Cellular and Molecular Mechanisms Underlying Altered Behavior in the Zebrafish Model**

Jennifer M. Panlilio, Neelakanteswar Aluru, and Mark E. Hahn

#### **Table of Contents**

##### **Supplemental Material: Reagents and Sources**

##### **Supplemental Material: Equipment, Sources, and Settings**

**Table S1.** Study-specific metrics.

**Table S2.** Swim bladder analysis: percent of fish with inflated swim bladders by day injected and dose.

**Table S3.** Opaque brains in *Tg(mbp:EGFP-CAAX)* larvae exposed to domoic acid by intravenous injection.

**Table S4.** Mortality in *Tg(mbp:EGFP-CAAX)* larvae exposed to domoic acid by intravenous injection.

**Table S5.** Acute neurological phenotypes following developmental exposures to domoic acid at 1 dpf.

**Table S6.** Acute neurological phenotypes following developmental exposures to domoic acid at 2 dpf.

**Table S7.** Acute neurological phenotypes following developmental exposures to domoic acid at 4 dpf.

**Table S8.** Results from Generalized Estimating Equations (GEE) models assessing the effect of dose and day post-exposure on the prevalence of the lack of touch responses in fish exposed at 1 and 2 days post fertilization.

**Table S9.** Results from Generalized Estimating Equations (GEE) models assessing the effect of dose and day post-exposure on the prevalence of convulsions or pectoral fin flapping in fish exposed at 1 and 2 days post fertilization.

**Table S10.** Post-hoc pairwise Dunnett comparisons following binomial modeling of percent responsiveness in startle behavior.

**Table S11.** Nonparametric analysis of short latency c-bend startle kinematics following exposure to different doses of domoic acid at 2 days post fertilization.

**Table S12.** Nonparametric analysis of long latency c-bend startle kinematics following exposure to different doses of domoic acid at 2 days post fertilization.

**Table S13.** Median and Interquartile range for startle kinematic parameters of fish exposed to different doses of domoic acid at 2 dpf.

**Table S14.** Nonparametric analysis of short latency c-bend startle kinematics following exposure to different doses of domoic acid at 1 day post fertilization.

**Table S15.** Nonparametric analysis of long latency c-bend startle kinematics following exposure to different doses of domoic acid at 1 day post fertilization.

**Table S16.** Nonparametric analysis of short latency c-bends kinematics following exposure to different doses of domoic acid at 4 days post fertilization.

**Table S17.** Nonparametric analysis of long latency c-bends kinematics following exposure to different doses of domoic acid at 4 days post fertilization.

**Table S18.** Nonparametric analysis of long latency c-bends kinematics in DomA-exposed larvae with or without inflated swim bladders.

**Table S19.** Nonparametric analysis of long latency c-bends kinematics in DomA-exposed larvae without bent body axes or with bent body axes.

**Table S20.** Myelin phenotype classification by day injected using confocal microscopy.

**Table S21.** Trials included to assess myelin labeling, imaged using widefield epifluorescence microscopy at 5 days post fertilization (dpf).

**Table S22.** Myelin phenotype classification by dose and day injected after fish were imaged using widefield epifluorescence microscopy at 5 days post fertilization.

**Table S23.** Drop-in-deviance test for incorporating day of exposure into multinomial logistic regression model.

**Table S24.** Multinomial logistic regression model for distribution of myelin phenotypes in fish exposed to 0.14 ng of domoic acid at different periods in development (in days post fertilization).

**Table S25.** Trials included to assess myelin labeling, imaged using widefield epifluorescence microscopy at 6 days post fertilization.

**Table S26.** Myelin phenotype classification by dose and day injected after fish were imaged using widefield epifluorescence microscopy at 6 days post fertilization.

**Table S27.** Trials included to assess myelin labeling, imaged using widefield epifluorescence microscopy at 7 days post fertilization.

**Table S28.** Myelin phenotype classification by domoic acid dose and day injected after fish were imaged using widefield epifluorescence microscopy at 7 days post fertilization.

**Table S29.** Multinomial logistic regression model for distribution of myelin phenotypes in fish exposed to different doses of domoic acid at 2 days post fertilization (dpf) and imaged at 5, 6, and 7 dpf.

**Table S30.** Genes associated with the enriched GO term: biological processes.

**Table S31.** Human Phenotype Ontology associated with differentially expressed genes at 3 days post fertilization.

**Video S1:** Acoustic startle response.

**Video S2:** Time-lapse video of *Tg(sox10:RFP) x Tg(nkx2.2a:mEGFP)* control fish.

**Video S3:** Time-lapse video of *Tg(sox10:RFP) x Tg(nkx2.2a:mEGFP)* DomA exposed fish.

**Figure S1.** Startle behavioral classification.

**Figure S2.** Qualitative myelin phenotype scoring.

**Figure S3.** Acute neurotoxic and morphological phenotypes associated with developmental exposure to domoic acid.

**Figure S4.** Startle kinematics comparisons among zebrafish exposed at 1, 2 and 4 dpf.

**Figure S5.** Startle kinematics comparisons with zebrafish exposed at 2 dpf with differing morphological attributes.

**Figure S6.** Startle kinematics and myelin sheath imaging in fish used for RNASeq.

**Additional File-** Excel and Code Document

**Additional File-** Video Document

## SUPPLEMENTARY MATERIAL

### Supplemental Material: Reagents and Sources

| Reagent                      | Source                                         |
|------------------------------|------------------------------------------------|
| Domoic acid                  | Sigma-Aldrich, St. Louis, MO (Catalog # D6152) |
| RNA isolation kit            | Zymo Direct-Zol kit (Catalog # R2062)          |
| TruSeq total RNA library kit | Illumina                                       |

### Supplemental Material: Equipment, Sources, and Settings

| Equipment                                     | Sources and Settings                                              |
|-----------------------------------------------|-------------------------------------------------------------------|
| glass capillary tubes (058 mm inner diameter) | World Precision Instruments (1B100F-4)                            |
| pipette puller                                | Sutter Instrument, model p-30 (heat 750, pull=0)                  |
| microinjector                                 | Narishige IM-300                                                  |
| speaker                                       | Visaton BG20-8 8" Full-Range Speaker with Whizzer Cone (#292-548) |
| amplifier                                     | WONDOM 100W TDA7498 Class-D Amplifier Board (#320-303)            |
| pulse generator                               | PulsePal, Sansworks                                               |
| high-speed video camera                       | Edgertronic                                                       |
| accelerometer                                 | PCB Piezotronics (model W356B11)                                  |
| pulse conditioner                             | PCB Piezotronics (model 480B31)                                   |
| analog filter                                 | Krohn-Hite Corporation (model 3382)                               |
| data acquisition board                        | National Instruments (model USB-6251)                             |
| confocal microscope                           | Zeiss (LSM-710 and LSM-780)                                       |
| 40x water objective                           | Zeiss C- Apochromat, NA= 1.1                                      |
| inverted epifluorescence microscope           | Zeiss                                                             |
| Bioanalyzer                                   | Agilent technologies, CA                                          |

**Table S1: Study-specific metrics**

| General assay            | Description                                       | Reference | DomA doses                   | Injection times          | Assessment times              | Total number of fish       |
|--------------------------|---------------------------------------------------|-----------|------------------------------|--------------------------|-------------------------------|----------------------------|
| Behavior                 | Startle responsiveness                            | Fig. 2    | 0, 0.09, 0.13, 0.14, 0.18 ng | 1, 2, 4 dpf              | 7 dpf                         | 1,865                      |
| Behavior                 | Startle kinematics                                | Fig. 3    | 0, 0.09, 0.13, 0.14, 0.18 ng | 1, 2, 4 dpf              | 7 dpf                         | 983                        |
| Behavior                 | Startle kinematics                                | Fig. 4    | 0, 0.09, 0.13, 0.14, 0.18 ng | 1, 2, 4 dpf              | 7 dpf                         | 1552                       |
| Microscopy               | Myelin sheath imaging (confocal)                  | Fig. 5    | 0, 0.13- 0.14 ng             | 1, 1.5, 2, 2.5, 4 dpf    | 5 dpf                         | 433                        |
| Microscopy               | Myelin sheath imaging (widefield epifluorescence) | Fig. 6    | 0, 0.09, 0.13, 0.14, 0.18 ng | 1, 1.5, 2, 2.5, 3, 4 dpf | 5 dpf                         | 2841                       |
| Microscopy               | Myelin sheath imaging (widefield epifluorescence) | Fig. 7    | 0, 0.09, 0.13, 0.14, 0.18 ng | 1, 2, 4 dpf              | 6, 7 dpf                      | 876                        |
| Microscopy               | Time-lapse myelin sheath imaging (confocal)       | Fig. 8    | 0, 0.14 ng                   | 2 dpf                    | 2.5-3 dpf                     | 11                         |
| RNASeq                   | -                                                 | Fig. 9    | 0, 0.14 ng                   | 2 dpf                    | 3, 5, 7 dpf                   | 3 pools of 6 per treatment |
| Morphological assessment | Swim bladder analysis                             | Fig. S3   | 0, 0.09, 0.13, 0.14, 0.18 ng | 1, 2, 4 dpf              | 5-7 dpf                       | 450                        |
| Behavior                 | Acute neurotoxicity                               | Fig. S3   | 0, 0.09, 0.14, 0.18 ng       | 1, 2, 4 dpf              | daily post-injection to 5 dpf | 3020                       |
| Mortality                | -                                                 | Table S4  | 0, 0.09, 0.13, 0.14, 0.18 ng | 1, 1.5, 2, 2.5, 3, 4 dpf | 5 dpf                         | 3937                       |
| Morphological assessment | Opaque brain analysis                             | Table S3  | 0, 0.09, 0.13, 0.14, 0.18 ng | 1, 1.5, 2, 2.5, 3, 4 dpf | 5 dpf                         | 3886                       |

*Notes:* Total number of fish indicate single animals unless otherwise noted. DomA= domoic acid, dpf= days post fertilization.

**Table S2: Swim bladder analysis: percent of fish with inflated swim bladders by day injected and dose**

|              |       | Control                                                | DomA (nominal dose)           |                 |                                                 |                          |
|--------------|-------|--------------------------------------------------------|-------------------------------|-----------------|-------------------------------------------------|--------------------------|
|              |       | 0 ng                                                   | 0.09 ng                       | 0.13 ng         | 0.14 ng                                         | 0.18 ng                  |
| Day injected | 1 dpf | 95%<br>(19/20)                                         |                               |                 | 100%<br>(24/24)                                 |                          |
|              | 2 dpf | 97.9% ± 1.42<br>(24/25, 8/8, 26/26, 22/24, 47/47, 4/4) |                               | 11.11%<br>(1/9) | 18.0% ± 2.64<br>(6/38, 2/12, 3/26, 5/27, 11/40) | 10%<br>(1/10)            |
|              | 4 dpf | 100%, 100%<br>(25/25, 10/10)                           | 83.63% ± 5.85<br>(17/19, 7/9) |                 | 84%<br>(21/25)                                  | 90%, 50%<br>(9/10, 6/12) |

*Notes:* Percent of fish with inflated swim bladders were recorded after imaging fish from 5-7 days post fertilization (dpf). Percent shown is the mean percent of the population with inflated swim bladders ± standard error of the mean if there were more than two repeated trials. Otherwise, values from a single trial are listed. Within the parentheses, the ratio of the number of fish that have inflated swim bladders to the total number of fish are listed, with individual trials separated by commas. Fish injected at 4 dpf with 0.18 ng domoic acid (DomA) that also had ‘opaque brains’ were excluded from this analysis. See Table S3 for opaque brain phenotype breakdown. See Figure S3B for the graphical representation of this table. DomA= domoic acid, dpf= days post fertilization, SE= standard error of the mean.

**Table S3: Opaque brains in *Tg(mbp:EGFP-CAAX)* larvae exposed to domoic acid by intravenous injection**

| Day injected | Control                                                                                        | DomA (nominal dose injected)     |                          |                                                |                                                   |
|--------------|------------------------------------------------------------------------------------------------|----------------------------------|--------------------------|------------------------------------------------|---------------------------------------------------|
|              | 0 ng                                                                                           | 0.09 ng                          | 0.13 ng                  | 0.14 ng                                        | 0.18 ng                                           |
| 1 dpf        | 0% ± 0<br>(0/90, 0/71, 0/62, 0/64, 0/69, 0/62)                                                 | 0% ± 0<br>(0/56, 0/67, 0/67)     | 0% (0/63)                |                                                | 0%<br>(0/73, 0/63, 0/68, 0/75, 0/31)              |
| 1.5 dpf      | 0% (0/40)                                                                                      |                                  |                          |                                                | 0%<br>0/46                                        |
| 2 dpf        | 0% ± 0<br>(0/39, 0/70, 0/70, 0/64, 0/73, 0/58,<br>0/48, 0/96, 0/20, 0/45, 0/38, 0/58,<br>0/58) | 0% ± 0<br>(0/64, 0/83, 0/76)     | 0%, 0%<br>(0/66, 0/48)   | 0% ± 0 (0/47, 0/20, 0/27, 0/46,<br>0/36, 0/47) | 0% ± 0<br>(0/74, 0/53, 0/60, 0/57, 0/72,<br>0/55) |
| 2.5 dpf      | 0%<br>0/20                                                                                     |                                  |                          | 0%<br>0/21                                     |                                                   |
| 3 dpf        | 0%<br>(0/6)                                                                                    |                                  |                          | 0%<br>0/14                                     |                                                   |
| 4 dpf        | 0% ± 0<br>(0/41, 0/65, 0/77, 0/71, 0/27, 0/32,<br>0/69)                                        | 0.5% ± 0.5<br>(0/76, 0/67, 1/72) | 0%, 2.2%<br>(0/91, 1/46) | (0%, 5%)<br>(2/40, 0/41)                       | 40.6% ± 9.5<br>(20/43, 26/80, 51/80, 14/72)       |

*Notes:* Percent of fish with opaque brains was recorded at 5 days post fertilization (dpf). Percent shown is the mean percent of fish with opaque brains ± the standard error of the mean when there were two or more repeated trials. Otherwise, values from a single trial are listed. Within the parentheses, the ratios of the number of fish that had opaque brains to the total number of fish are listed, with individual trials separated by commas.

DomA= domoic acid, dpf= days post fertilization, SE= standard error of the mean.



**Table S4: Mortality in *Tg(mbp:EGFP-CAAX)* larvae exposed to domoic acid by intravenous injection**

| Day injected   | Control                                                                                            | DomA (nominal dose)              |                          |                                                   |                                                        |
|----------------|----------------------------------------------------------------------------------------------------|----------------------------------|--------------------------|---------------------------------------------------|--------------------------------------------------------|
|                | 0 ng                                                                                               | 0.09 ng                          | 0.13 ng                  | 0.14 ng                                           | 0.18 ng                                                |
| <b>1 dpf</b>   | 0.4% ± 0.4<br>(2/92, 0/71, 0/62, 0/64, 0/69,0/62)                                                  | 1.9% ± 1.3<br>(0/56, 1/68, 3/70) | 3.1%<br>(2/65)           |                                                   | 0.8% ± 0.5<br>(2/75, 0/63,1/69,0/75,0/31)              |
| <b>1.5 dpf</b> | 0% (0/40)                                                                                          |                                  |                          |                                                   | 0%<br>(0/46)                                           |
| <b>2 dpf</b>   | 1.2% ± 0.7<br>(4/43, 2/72, 0/70, 0/64, 0/73, 0/58,<br>0/48, 0/96, 0/20, 0/45, 0/38, 0/58,<br>2/60) | 0.4% ± 0.4<br>(0/64, 0/83, 1/77) | 2.9%, 0%<br>(2/68, 0/48) | 0% ± 0<br>(0/47, 0/20, 0/27, 0/46, 0/36,<br>0/47) | 6.2% ± 3.9<br>(6/80, 17/70, 0/60, 0/57, 0/72,<br>3/58) |
| <b>2.5 dpf</b> | 0%<br>(0/20)                                                                                       |                                  |                          | 0%<br>(0/21)                                      |                                                        |
| <b>3 dpf</b>   | 0%<br>(0/6)                                                                                        |                                  |                          | 0%<br>(0/14)                                      |                                                        |
| <b>4 dpf</b>   | 0.2% ± 0.2<br>(0/41, 1/66, 0/77, 0/71, 0/27, 0/32,<br>0/69)                                        | 0%<br>(0/76, 0/67, 0/72)         | 0%, 0%<br>(0/91, 0/46)   | 0%, 0%<br>(0/40, 0/41)                            | 0.9% ± 0.6<br>(1/44, 0/80, 1/81, 0/72)                 |

*Notes:* Percent mortality was recorded at 5 days post fertilization (dpf). Percent shown is the mean percent mortality ± standard error of the mean when there were more than two repeated experiments. Otherwise, percent from a single trial is listed. Within the parentheses, the ratios of the number of fish that died to the total number of fish are listed, with individual trials separated by commas. DomA= domoic acid, dpf= days post fertilization, SE= standard error of the mean.

**Table S5: Acute neurological phenotypes following developmental exposures to domoic acid at 1 dpf**

| Dose (ng) | Trials | Day observed | Convulsions or pectoral fin flapping<br>mean % ± SE or mean %, mean %<br>(# convulsing/total alive) | No touch response<br>mean % ± SE or mean %, mean %<br>(# no touch response/ total alive) |
|-----------|--------|--------------|-----------------------------------------------------------------------------------------------------|------------------------------------------------------------------------------------------|
| 0         | n= 5   | 2 dpf        | 0%<br>(0/92, 0/71, 0/64, 0/69, 0/62)                                                                | 0.4% ± 0.4<br>(2/92, 0/71, 0/64, 0/69, 0/62)                                             |
|           |        | 3 dpf        | 0%<br>(0/91, 0/71, 0/64, 0/69, 0/62)                                                                | 0.2% ± 0.2<br>(1/91, 0/71, 0/64, 0/69, 0/62)                                             |
|           |        | 4 dpf        | 0%<br>(0/90, 0/71, 0/64, 0/69, 0/62)                                                                | 0%<br>(0/90, 0/71, 0/64, 0/69, 0/62)                                                     |
|           |        | 5 dpf        | 0%<br>(0/90, 0/71, 0/64, 0/69, 0/62)                                                                | 0%<br>(0/90, 0/71, 0/64, 0/69, 0/62)                                                     |
| 0.09      | n= 2   | 2 dpf        | 2.9%, 0%<br>(2/68, 0/69)                                                                            | 32.4%, 15.9%<br>(22/68, 11/69)                                                           |
|           |        | 3 dpf        | 0%, 0%<br>(0/68, 0/68)                                                                              | 0%, 0%<br>(0/68, 0/68)                                                                   |
|           |        | 4 dpf        | 0%, 0%<br>(0/68, 0/68)                                                                              | 0%, 0%<br>(0/68, 0/68)                                                                   |
|           |        | 5 dpf        | 0%, 0%<br>(0/67, 0/67)                                                                              | 0%, 0%<br>(0/67, 0/67)                                                                   |
| 0.18      | n= 4   | 2 dpf        | 8.0% ± 3.0<br>(5/73, 8/66, 0/75, 4/31)                                                              | 53.4% ± 12.9<br>(11/73, 47/66, 47/75, 20/31)                                             |
|           |        | 3 dpf        | 2.0% ± 1.6<br>(5/73, 0/66, 1/75, 0/31)                                                              | 17.3% ± 9.7<br>(11/73, 4/66, 2/75, 14/31)                                                |
|           |        | 4 dpf        | 0.8% ± 0.8<br>(0/73, 0/66, 0/75, 1/31)                                                              | 0.4% ± 0.4<br>(1/73, 0/66, 0/75, 0/31)                                                   |
|           |        | 5 dpf        | 0%<br>(0/73, 0/63, 0/75, 0/31)                                                                      | 0%<br>(0/73, 0/63, 0/75, 0/31)                                                           |

*Notes:* Percent of fish exhibiting convulsions or pectoral fin flapping (combined) or no touch responses tracked daily (1 day post exposure until 5 days post fertilization (dpf) or between 2-5 dpf). n = the number of repeated experimental trials. Percent shown is the mean percent of fish exhibiting convulsions/fin flapping or no touch responses ± the standard error of the mean if there were more than two repeated trials. Otherwise, values from a single trial are listed. Within the parentheses, the ratios of the number of fish that exhibited convulsions/fin flapping or no touch responses are listed, with individual trials separated by commas. See Figure S3C and Figure S3D for the graphical representation of this table. DomA= domoic acid, dpf= days post fertilization, SE= standard error of the mean.

**Table S6: Acute neurological phenotypes following developmental exposures to domoic acid at 2 dpf**

| Dose (ng) | Trials | Day observed | Convulsions or pectoral fin flapping<br>mean % $\pm$ SE or mean %, mean%<br>(# convulsing/total alive) | No touch response<br>mean % $\pm$ SE or mean %, mean%<br>(# no touch response/ total alive) |
|-----------|--------|--------------|--------------------------------------------------------------------------------------------------------|---------------------------------------------------------------------------------------------|
| 0         | n= 11  | 3 dpf        | 0%<br>(0/39, 0/71, 0/70, 0/73, 0/58, 0/48, 0/96, 0/20, 0/45, 0/38, 0/58)                               | 0.2% $\pm$ 0.2<br>(1/39, 0/71, 0/70, 0/73, 0/58, 0/48, 0/96, 0/20, 0/45, 0/38, 0/58)        |
|           |        | 4 dpf        | 0%<br>(0/39, 0/71, 0/70, 0/73, 0/58, 0/48, 0/96, 0/20, 0/45, 0/38, 0/58)                               | 0.4% $\pm$ 0.3<br>(1/39, 1/71, 0/70, 0/73, 0/58, 0/48, 0/96, 0/20, 0/45, 0/38, 0/58)        |
|           |        | 5dpf         | 0%<br>(0/39, 0/70, 0/70, 0/73, 0/58, 0/48, 0/96, 0/20, 0/45, 0/38, 0/58)                               | 0.1% $\pm$ 0.1<br>(0/39, 1/70, 0/70, 0/73, 0/58, 0/48, 0/96, 0/20, 0/45, 0/38, 0/58)        |
| 0.09      | n = 2  | 3 dpf        | 2.4%, 0%<br>(2/83, 0/77)                                                                               | 16.9%, 11.7%<br>(14/83, 9/77)                                                               |
|           |        | 4 dpf        | 0%, 0%<br>(0/83, 0/77)                                                                                 | 0%, 1.3%<br>(0/83, 1/77)                                                                    |
|           |        | 5dpf         | 0%, 0%<br>(0/83, 0/76)                                                                                 | 0%, 0%<br>(0/83, 0/76)                                                                      |
| 0.14      | n= 6   | 3 dpf        | 23.7% $\pm$ 11.6<br>(4/47, 15/20 10/27, 0/46, 1/36, 9/47)                                              | 38.8% $\pm$ 10.2<br>(13/47, 11/20, 22/27, 8/46, 7/36, 15/47)                                |
|           |        | 4 dpf        | 0%<br>(0/47, 0/20, 0/27, 0/46, 0/36, 0/47)                                                             | 1.5% $\pm$ 1.5<br>(0/47, 0/20, 0/27, 4/46, 0/36, 0/47)                                      |
|           |        | 5dpf         | 0%<br>(0/47, 0/20, 0/27, 0/46, 0/36, 0/47)                                                             | 0.6% $\pm$ 0.6<br>(0/47, 0/20, 1/27, 0/46, 0/36, 0/47)                                      |
| 0.18      | n= 4   | 3 dpf        | 40.0% $\pm$ 7.4<br>(27/74, 43/70, 18/66, 25/72)                                                        | 47.8% $\pm$ 16.0<br>(46/74, 0/70, 41/66, 48/72)                                             |
|           |        | 4 dpf        | 0.4% $\pm$ 0.4<br>(1/74, 0/53, 0/66, 0/72)                                                             | 5.6% $\pm$ 3.6<br>(11/74, 4/53, 0/66, 0/72)                                                 |
|           |        | 5dpf         | 1.4% $\pm$ 1.4<br>(0/74, 3/53, 0/60, 0/72)                                                             | 0.4% $\pm$ 0.4<br>(1/74, 0/53, 0/60, 0/72)                                                  |

*Notes:* Percent of fish exhibiting convulsions/pectoral fin flapping or no touch responses tracked daily (1 day post exposure until 5 days post fertilization (dpf) or between 3-5 dpf). n= to the number of repeated experimental trials. Percent shown is the mean percent of fish exhibiting convulsions/fin flapping or no touch responses  $\pm$  the standard error of the mean if there were more than two repeated trials. Otherwise, values from a single trial are listed. Within the parentheses, the ratios of the number of fish that exhibited convulsions/fin flapping or no touch responses are listed, with individual trials separated by commas. See Figure S3C and Figure S3D for the graphical representation of this table. DomA= domoic acid, dpf= days post fertilization, SE= standard error of the mean.

**Table S7: Acute neurological phenotypes following developmental exposures to domoic acid at 4 dpf**

| <b>Dose (ng)</b> | <b>Trials</b> | <b>Convulsions or pectoral fin flapping<br/>mean % <math>\pm</math> SE or mean %, mean %<br/>(# convulsing/total alive)</b> | <b>No touch response<br/>mean % <math>\pm</math> SE or mean %, mean %<br/>(# no touch response/ total alive)</b> |
|------------------|---------------|-----------------------------------------------------------------------------------------------------------------------------|------------------------------------------------------------------------------------------------------------------|
| 0 ng             | n= 8          | 0% $\pm$ 0<br>(0/41, 0/65, 0/77 0/71, 0/27, 0/46, 0/32, 0/69)                                                               | 0% $\pm$ 0<br>(0/41, 0/65, 0/77 0/71, 0/27, 0/46, 0/32, 0/69)                                                    |
| 0.09 ng          | n= 3          | 0% $\pm$ 0<br>(0/76, 0/67, 0/72)                                                                                            | 0% $\pm$ 0<br>(0/76, 0/67, 0/72)                                                                                 |
| 0.14 ng          | n= 2          | 0%, 0%<br>(0/40, 0/41)                                                                                                      | 0%, 5.0%<br>(0/41, 2/40)                                                                                         |
| 0.18 ng          | n= 4          | 1.9% $\pm$ 1.9<br>(0/43, 0/80, 6/80, 0/72)                                                                                  | 24.1% $\pm$ 15.3<br>(0/43, 26/80, 51/80, 0/72)                                                                   |

*Notes:* Percent of fish exhibiting convulsions/fin flapping or no touch responses tracked 1 day post exposure (at 5 dpf). n= to the number of repeated experimental trials. Percent shown is the mean percent of fish exhibiting convulsions/fin flapping or no touch responses  $\pm$  the standard error of the mean if there were more than two repeated trials. Otherwise, values from a single trial are listed. Within the parentheses, the ratios of the number of fish that exhibited convulsions/fin flapping or no touch responses are listed with individual trials separated by commas. See Figure S3C and Figure S3D for the graphical representation of this table. DomA= domoic acid, dpf= days post fertilization, SE= standard error of the mean.

**Table S8: Results from Generalized Estimating Equations (GEE) models assessing the effect of dose and day post-exposure on the prevalence of the lack of touch responses in fish exposed at 1 and 2 days post fertilization**

|                             | <b>Exposure at 1 dpf</b>     | <b>Exposure at 2 dpf</b>     |
|-----------------------------|------------------------------|------------------------------|
|                             | <b>Est Coef (Std. error)</b> | <b>Est Coef (Std. error)</b> |
| <b>Intercept</b>            | -3.8 (0.5)**                 | -4.3 (0.4) **                |
| <b>Dose</b>                 | +22.1 (3.9)**                | +24.0 (4.2)**                |
| <b>2 days post exposure</b> | -2.2 (0.7)**                 | -2.9 (0.6)**                 |
| <b>3 days post exposure</b> | -5.8 (1.3)**                 | -4.9 (0.6)**                 |
| <b>4 days post exposure</b> | -46.3 (0.5)**                | NA                           |

Notes: dpf= days post fertilization, Est Coef= estimated coefficient, Std. error= standard error. Control fish assessed 1 day post exposure was selected as the reference group. \*\* =  $p < 0.01$

**Table S9: Results from Generalized Estimating Equations (GEE) models assessing the effect of dose and day post-exposure on the prevalence of convulsions or pectoral fin flapping in fish exposed at 1 and 2 days post fertilization**

|                             | Exposure at 1 dpf     | Exposure at 2 dpf     |
|-----------------------------|-----------------------|-----------------------|
|                             | Est Coef (Std. error) | Est Coef (Std. error) |
| <b>Intercept</b>            | -7.3 (1.2) **         | -7.0 (1.1) **         |
| <b>Dose</b>                 | +26.3 (6.8)**         | +37.2 (6.6)**         |
| <b>2 days post exposure</b> | -1.2 (0.8)            | -5.4 (0.9)**          |
| <b>3 days post exposure</b> | -3.0 (0.9)**          | -4.3 (0.7)**          |
| <b>4 days post exposure</b> | -44.8 (0.8)**         | NA                    |

*Notes:* dpf= days post fertilization, Est Coef= estimated coefficient, Std. error= standard error. Control fish assessed 1 day post exposure was selected as the reference group. \*\* \*\*p < 0.001, \*p < 0.01

**Table S10: Post-hoc pairwise Dunnett comparisons following binomial modeling of percent responsiveness in startle behavior**

| Dose comparisons<br>(DomA - Control) | Exposures at 1 dpf |                  | Exposures at 2 dpf |                  | Exposures at 4 dpf |                   |
|--------------------------------------|--------------------|------------------|--------------------|------------------|--------------------|-------------------|
|                                      | Coef<br>(Std. Er)  | Pr(> z )         | Coef<br>(Std. Er)  | Pr(> z )         | Coef<br>(Std. Er)  | Pr(> z )          |
| <b>0.18 ng – 0 ng == 0</b>           | -0.71<br>(0.13)    | <b>&lt; 1e-4</b> | -0.64<br>(0.13)    | <b>2.2e-6</b>    | -0.90<br>(0.15)    | <b>&lt; 1e- 5</b> |
| <b>0.14 ng – 0 ng == 0</b>           | -0.77<br>(0.19)    | <b>0.0003</b>    | -1.10<br>(0.12)    | <b>&lt; 1e-6</b> | 0.01<br>(0.28)     | 1.00              |
| <b>0.13 ng – 0 ng == 0</b>           | -0.79<br>(0.19)    | <b>0.0002</b>    | -0.85<br>(0.15)    | <b>&lt; 1e-6</b> | 0.10<br>(0.17)     | 0.96              |
| <b>0.09 ng – 0 ng == 0</b>           | -0.13<br>(0.15)    | 0.85             | -0.85<br>(0.14)    | <b>&lt; 1e-6</b> | 0.04<br>(0.15)     | 1.00              |

*Notes:* Significant values are in **bold red font**. Comparisons were made between fish exposed to different doses of domoic acid (DomA) relative to the control. See Figure 2 for the graphical representation of this table. DomA= domoic acid, dpf= days post fertilization, Coef= estimated coefficient, Std. Er= standard error, Pr(>|z|)= p-value of the z-statistic.

**Table S11: Nonparametric analysis of short latency c-bend startle kinematics following exposure to different doses of domoic acid at 2 days post fertilization**

| dose (ng)   | trial day | n (SLC)                       | Maximal Angular Velocity (SLC) |                       |         |                   | Bend angle (SLC) |                       |         |                   |
|-------------|-----------|-------------------------------|--------------------------------|-----------------------|---------|-------------------|------------------|-----------------------|---------|-------------------|
|             |           |                               | RE                             | 95% CI [Lower, Upper] | Stat    | p                 | RE               | 95% CI [Lower, Upper] | Stat    | p                 |
| <b>0.09</b> | 5/30/16   | 0 ng (n= 24), 0.09 ng (n= 40) | 0.209                          | [0.073, 0.346]        | -4.877  | <b>2.98e-5</b>    | 0.20             | [0.068, 0.332]        | -5.18   | <b>1.48e-5</b>    |
|             | 5/19/16   | 0 ng (n=37), 0.09 ng (n= 36)  | 0.115                          | [0.015, 0.214]        | -8.987  | <b>2.56e-10</b>   | 0.116            | [0.022, 0.211]        | -9.1    | <b>1.15e-12</b>   |
| <b>0.13</b> | 5/30/16   | 0 ng (n= 24), 0.13ng (n= 35)  | 0.107                          | [-0.007, 0.221]       | -7.877  | <b>1.41e-9</b>    | 0.11             | [0.004, 0.215]        | -8.41   | <b>6.65e-10</b>   |
|             | 6/24/16   | 0 ng (n= 21), 0.13ng (n= 9)   | 0.001                          | [0, 0.002]            | -1010   | <b>&lt; 1e-14</b> | 0.001            | [0, 0.002]            | -1010   | <b>&lt; 1e-14</b> |
| <b>0.14</b> | 6/24/16   | 0 ng (n= 21), 0.14 ng (n =11) | 0.001                          | [0, 0.002]            | -1010   | <b>&lt; 1e-14</b> | 0.001            | [0, 0.002]            | -1010   | <b>&lt; 1e-14</b> |
|             | 10/10/16  | 0 ng (n= 34), 0.14 ng (n= 17) | 0.112                          | [0.004, 0.221]        | -7.252  | <b>&lt; 1e-14</b> | 0.092            | [0, 0.184]            | -8.94   | <b>&lt; 1e-14</b> |
|             | 9/23/16   | 0 ng (n= 42), 0.14 ng (n= 31) | 0.06                           | [-0.006, 0.126]       | 13.33   | <b>&lt; 1e-14</b> | 0.029            | [-0.008, 0.067]       | -25.08  | <b>&lt; 1e-14</b> |
| <b>0.18</b> | 5/19/16   | 0 ng (n=37), 0.18 ng (n= 26)  | 0.169                          | [0.023, 0.316]        | -5.253  | <b>1.49e-5</b>    | 0.09             | [0.002, 0.179]        | -10.40  | <b>8.10e-15</b>   |
|             | 4/27/16   | 0 ng (n=17), 0.18 ng (n= 10)  | 0.071                          | [-0.056, 0.197]       | -7.183  | <b>&lt; 1e-14</b> | 0.094            | [-0.039, 0.228]       | -6.32   | <b>&lt; 1e-14</b> |
|             | 3/27/16   | 0 ng (n= 23), 0.18 ng (n=19)  | 0.005                          | [-0.007,0.016]        | -89.063 | <b>&lt; 1e-14</b> | 0.002            | [-0.004, 0.009]       | -153.80 | <b>&lt; 1e-14</b> |
|             | 4/15/16   | 0 ng (n=8), 0.18 ng (n= 8)    | 0.001                          | [-0.172, 0.174]       | -5.646  | <b>&lt; 1e-14</b> | 0.001            | [-0.172, 0.174]       | -5.646  | <b>&lt; 1e-14</b> |

Notes: Trials with multiple doses were analyzed using nonparametric multiple comparison procedures with Dunnett-type contrasts to compare kinematics of fish exposed at each dose to the controls (05/30/16, 05/19/16, 06/24/16). Trials with single doses were tested using nonparametric Behrens-Fisher t-tests (10/10/16, 09/23/16, 4/27/16, 03/27/16, 04/15/16). Significant values are in **bold red font**. See Figure 3 for the graphical representation of this table.

SLC= short latency c-bends, DomA= domoic acid, dpf= days post fertilization, RE= estimated relative effect size, Lower= lower limit of the confidence interval, Upper= upper limit of the confidence interval, Stat= test statistic, p= adjusted p-value.



**Table S12: Nonparametric analysis of long latency c-bend startle kinematics following exposure to different doses of domoic acid at 2 days post fertilization**

| dose (ng)   | trial day | n (LLC)                        | Maximal Angular Velocity (LLC) |                       |         |                  | Bend angle (LLC) |                       |         |                  |
|-------------|-----------|--------------------------------|--------------------------------|-----------------------|---------|------------------|------------------|-----------------------|---------|------------------|
|             |           |                                | RE                             | 95% CI [Lower, Upper] | Stat    | p                | RE               | 95% CI [Lower, Upper] | Stat    | p                |
| <b>0.09</b> | 5/30/16   | 0 ng (n= 40), 0.09 ng (n= 48)  | 0.21                           | [0.099, 0.321]        | -5.892  | <b>1.53e-7</b>   | 0.238            | [0.121, 0.354]        | -5.078  | <b>4.51e-6</b>   |
|             | 5/19/16   | 0 ng (n=56), 0.09 ng (n= 47)   | 0.253                          | [0.143, 0.363]        | -5.027  | <b>4.64e-6</b>   | 0.207            | [0.105, 0.309]        | -6.425  | <b>1.18e-8</b>   |
| <b>0.13</b> | 5/30/16   | 0 ng (n= 40), 0.13 ng (n= 48)  | 0.13                           | [0.046, 0.215]        | -9.904  | <b>1.33e-15</b>  | 0.161            | [0.062, 0.260]        | -7.734  | <b>4.19e-11</b>  |
|             | 6/24/16   | 0 ng (n= 24), 0.13 ng (n= 30)  | 0.044                          | [-0.025, 0.114]       | -14.615 | <b>2.24e-14</b>  | 0.062            | [-0.019, 0.144]       | -12.182 | <b>1.98e-12</b>  |
| <b>0.14</b> | 6/24/16   | 0 ng (n= 24), 0.14 ng (n = 30) | 0.043                          | [-0.028,0.114]        | -14.24  | <b>4.22e-14</b>  | 0.054            | [-0.021, 0.129]       | -13.41  | <b>1.99e-13</b>  |
|             | 10/10/16  | 0 ng (n= 47), 0.14 ng (n= 40)  | 0.062                          | [0.005, 0.118]        | -15.618 | <b>&lt;1e-14</b> | 0.107            | [0.029, 0.185]        | -10.078 | <b>&lt;1e-14</b> |
|             | 9/23/16   | 0 ng (n= 71), 0.14 ng (n= 65)  | 0.073                          | [0.028, 0.119]        | -18.491 | <b>&lt;1e-14</b> | 0.085            | [0.038,0.132]         | -17.458 | <b>&lt;1e-14</b> |
| <b>0.18</b> | 5/19/16   | 0 ng (n=56), 0.18 ng (n=58)    | 0.233                          | [0.127, 0.340]        | -5.61   | <b>3.96e-7</b>   | 0.201            | [0.104, 0.298]        | -6.89   | <b>1.41e-9</b>   |
|             | 4/27/16   | 0 ng (n= 19), 0.18 ng (n=20)   | 0.108                          | [-0.014, 0.23]        | -6.61   | <b>&lt;1e-14</b> | 0.142            | [-0.004, 0.288]       | -4.976  | <b>&lt;1e-14</b> |
|             | 3/27/16   | 0 ng (n= 28), 0.18 ng (n = 26) | 0.074                          | [-0.01, 0.159]        | -10.298 | <b>&lt;1e-14</b> | 0.11             | [0.009, 0.211]        | -7.725  | <b>&lt;1e-14</b> |
|             | 4/15/16   | 0 ng (n=18), 0.18 ng (n= 33)   | 0.059                          | [-0.045, 0.162]       | -8.966  | <b>&lt;1e-14</b> | 0.072            | [-0.042, 0.187]       | -7.835  | <b>&lt;1e-14</b> |

Notes: Trials with multiple doses were analyzed using nonparametric multiple comparison procedures with Dunnett-type contrasts to compare kinematics of fish exposed at each dose to the controls (05/30/16, 05/19/16, 06/24/16). Trials with single doses were tested using nonparametric Behrens-Fisher t-tests (10/10/16, 09/23/16, 4/27/16, 03/27/16, 04/15/16). Significant values are in **bold red font**. See Figure 4 for the graphical representation of this table.

LLC= long latency c-bends, DomA= domoic acid, dpf= days post fertilization, RE= estimated relative effect size, Lower= lower limit of the confidence interval, Upper= upper limit of the confidence interval, Stat= test statistic, p= adjusted p-value.

**Table S13: Median and Interquartile range for startle kinematic parameters of fish exposed to different doses of domoic acid at 2 dpf**

| Dose (ng) | Trial day  | LLC        |       |                          |      | SLC        |       |                          |       |
|-----------|------------|------------|-------|--------------------------|------|------------|-------|--------------------------|-------|
|           |            | Bend angle |       | Maximal angular velocity |      | Bend angle |       | Maximal angular velocity |       |
|           |            | Median     | IQR   | Median                   | IQR  | Median     | IQR   | Median                   | IQR   |
| 0         | 03_27_2016 | 142.74     | 28.39 | 15.36                    | 3.55 | 139.48     | 12.51 | 20.07                    | 1.93  |
|           | 04_15_2016 | 134.79     | 44.27 | 11.70                    | 4.36 | 147.88     | 15.51 | 19.93                    | 3.71  |
|           | 04_27_2016 | 153.34     | 18.79 | 15.97                    | 5.05 | 150.72     | 17.73 | 19.03                    | 2.83  |
|           | 05_19_2016 | 156.25     | 63.49 | 13.27                    | 8.64 | 156.78     | 24.74 | 19.50                    | 1.80  |
|           | 05_30_2016 | 143.56     | 29.35 | 13.17                    | 6.22 | 148.01     | 26.58 | 19.79                    | 1.83  |
|           | 06_24_2016 | 180.46     | 30.42 | 17.14                    | 5.14 | 163.25     | 15.73 | 19.72                    | 1.55  |
|           | 09_23_2016 | 149.24     | 35.88 | 15.32                    | 4.73 | 150.68     | 21.75 | 20.08                    | 1.96  |
|           | 10_10_2016 | 155.43     | 27.64 | 16.08                    | 5.26 | 151.30     | 18.59 | 20.33                    | 2.53  |
| 0.09      | 05_19_2016 | 97.4       | 61.15 | 8.85                     | 5.99 | 90.33      | 60.19 | 11.51                    | 7.27  |
|           | 05_30_2016 | 101.51     | 76.40 | 7.24                     | 5.78 | 102.85     | 78.20 | 10.59                    | 12.63 |
| 0.13      | 05_30_2016 | 76.57      | 74.10 | 4.94                     | 5.90 | 74.69      | 51.29 | 10.33                    | 9.42  |
|           | 06_24_2016 | 83.02      | 55.10 | 5.67                     | 3.01 | 49.15      | 36.17 | 5.09                     | 2.13  |
| 0.14      | 06_24_2016 | 95.69      | 46.50 | 6.13                     | 3.47 | 64.37      | 29.90 | 6.27                     | 2.87  |
|           | 09_23_2016 | 78.58      | 45.61 | 5.8                      | 4.01 | 58.06      | 44.90 | 5.73                     | 3.53  |
|           | 10_10_2016 | 81.29      | 66.03 | 6.3                      | 4.29 | 46.50      | 56.58 | 5.69                     | 3.11  |
| 0.18      | 03_27_2016 | 75.02      | 63.27 | 5.68                     | 4.55 | 56.61      | 61.86 | 6.66                     | 7.27  |
|           | 04_15_2016 | 59.56      | 39.59 | 4.26                     | 2.41 | 37.12      | 17.42 | 4.59                     | 2.90  |
|           | 04_27_2016 | 49.77      | 59.17 | 4.00                     | 2.52 | 54.28      | 42.04 | 6.98                     | 4.98  |
|           | 05_19_2016 | 71.3       | 58.68 | 6.60                     | 3.97 | 67.48      | 79.20 | 6.38                     | 10.59 |

*Note:* IQR= interquartile range, 3rd quantile- 1st quantile, LLC= long latency c-bends, SLC= short latency c-bends. This table supports Figures 3 and 4.

**Table S14: Nonparametric analysis of short latency c-bend startle kinematics following exposure to different doses of domoic acid at 1 day post fertilization**

| dose (ng)   | trial day | n (SLC)                       | Maximal Angular Velocity (SLC) |                       |       |              | Bend angle (SLC) |                       |       |              |
|-------------|-----------|-------------------------------|--------------------------------|-----------------------|-------|--------------|------------------|-----------------------|-------|--------------|
|             |           |                               | RE                             | 95% CI [Lower, Upper] | Stat  | p            | RE               | 95% CI [Lower, Upper] | Stat  | p            |
| <b>0.09</b> | 5/30/16   | 0 ng (n= 39), 0.09 ng (n= 36) | 0.555                          | [0.391, 0.719]        | 0.800 | 0.669        | 0.426            | [0.268, 0.584]        | -1.10 | 0.469        |
|             | 5/19/16   | 0 ng (n=25), 0.09 ng (n= 25)  | 0.419                          | [0.226, 0.613]        | -0.96 | 0.532        | 0.581            | [0.387, 0.774]        | 0.96  | 0.536        |
| <b>0.13</b> | 5/30/16   | 0 ng (n= 39), 0.13 ng (n=19)  | 0.356                          | [0.140, 0.573]        | -1.59 | 0.232        | 0.309            | [0.121, 0.497]        | -2.39 | <b>0.045</b> |
| <b>0.14</b> | 9/04/16   | 0 ng (n=35), 0.14 ng(n=35)    | 0.557                          | [0.416, 0.697]        | 0.81  | 0.423        | 0.347            | [0.21,0.484]          | -2.24 | <b>0.029</b> |
| <b>0.18</b> | 5/19/16   | 0 ng (n=25), 0.18 ng (n=18)   | 0.449                          | [0.235,0.663]         | -0.55 | 0.805        | 0.549            | [0.336, 0.762]        | 0.53  | 0.82         |
|             | 4/27/16   | 0 ng (n=13), 0.18 ng (n= 16)  | 0.279                          | [0.078, 0.48]         | -2.26 | <b>0.032</b> | 0.274            | [0.077,0.471]         | -2.36 | <b>0.026</b> |
|             | 4/15/16   | 0 ng (n=12), 0.18 ng (n= 12)  | 0.34                           | [0.088, 0.593]        | -1.32 | 0.203        | 0.222            | [0.01, 0.435]         | -2.71 | <b>0.013</b> |

*Notes:* Trials with multiple doses were analyzed using nonparametric multiple comparison procedures with Dunnett-type contrasts to compare kinematics of fish exposed at each dose to the controls (05/30/16, 05/19/16). Trials with single doses were tested using nonparametric Behrens-Fisher t-tests (09/04/16, 04/27/16, 04/15/16). Significant values are in **bold red font**. See Figure 3 for the graphical representation of this table. SLC= short latency c-bends, DomA= domoic acid, dpf= days post fertilization, RE= estimated relative effect size, Lower= lower limit of the confidence interval, Upper= upper limit of the confidence interval, Stat= test statistic, p= adjusted p-value.

**Table S15: Nonparametric analysis of long latency c-bend startle kinematics following exposure to different doses of domoic acid at 1 day post fertilization**

| dose (ng)   | trial day | n (LLC)                       | Maximal Angular Velocity (LLC) |                       |        |                   | Bend angle (LLC) |                       |        |                   |
|-------------|-----------|-------------------------------|--------------------------------|-----------------------|--------|-------------------|------------------|-----------------------|--------|-------------------|
|             |           |                               | RE                             | 95% CI [Lower, Upper] | Stat   | p                 | RE               | 95% CI [Lower, Upper] | Stat   | p                 |
| <b>0.09</b> | 5/30/16   | 0 ng (n= 47), 0.09 ng (n= 51) | 0.429                          | [0.296, 0.562]        | -1.212 | 0.39              | 0.476            | [0.340, 0.613]        | -0.398 | 0.901             |
|             | 5/19/16   | 0 ng (n= 37), 0.09 ng (n= 35) | 0.492                          | [0.334, 0.650]        | -0.115 | 0.99              | 0.544            | [0.388, 0.699]        | 0.6313 | 0.742             |
| <b>0.13</b> | 5/30/16   | 0 ng (n= 47), 0.13 ng (n= 31) | 0.298                          | [0.156, 0.440]        | -3.24  | <b>0.004</b>      | 0.321            | [0.163, 0.478]        | -2.63  | <b>0.023</b>      |
| <b>0.14</b> | 9/04/16   | 0 ng (n=50), 0.14 ng (n= 48)  | 0.385                          | [0.271, 0.498]        | -2.02  | <b>0.046</b>      | 0.335            | [0.224, 0.447]        | -2.941 | <b>0.004</b>      |
| <b>0.18</b> | 5/19/16   | 0 ng (n= 37), 0.18 ng (n= 41) | 0.372                          | [0.228, 0.517]        | -1.984 | 0.09              | 0.405            | [0.258, 0.552]        | -1.454 | 0.249             |
|             | 4/27/16   | 0 ng (n= 15), 0.18 ng (n= 17) | 0.118                          | [-0.012, 0.247]       | -6.087 | <b>&lt; 1e-14</b> | 0.11             | [-0.004, 0.224]       | -6.997 | <b>&lt; 1e-14</b> |
|             | 4/15/16   | 0 ng (n= 36), 0.18 ng (n= 37) | 0.354                          | [0.221, 0.486]        | -2.214 | <b>0.031</b>      | 0.322            | [0.196, 0.448]        | -2.817 | <b>0.006</b>      |

Notes: Trials with multiple doses were analyzed using nonparametric multiple comparison procedures with Dunnett-type contrasts to compare kinematics of fish exposed at each dose to the controls (05/30/16, 05/19/16). Trials with single doses were tested using nonparametric Behrens-Fisher t-tests (09/04/16, 04/27/16, 04/15/16). Significant values are in **bold red font**. See Figure 4 for the graphical representation of this table.

LLC= long latency c-bends, DomA= domoic acid, dpf= days post fertilization, RE= estimated relative effect size, Lower= lower limit of the confidence interval, Upper= upper limit of the confidence interval, Stat= test statistic, p= adjusted p-value.

**Table S16: Nonparametric analysis of short latency c-bends kinematics following exposure to different doses of domoic acid at 4 days post fertilization**

| dose (ng) | trial day | n (SLC)                       | Maximal Angular Velocity (SLC) |                       |        |              | Bend angle (SLC) |                       |        |              |
|-----------|-----------|-------------------------------|--------------------------------|-----------------------|--------|--------------|------------------|-----------------------|--------|--------------|
|           |           |                               | RE                             | 95% CI [Lower, Upper] | Stat   | p            | RE               | 95% CI [Lower, Upper] | Stat   | p            |
| 0.09      | 5/30/16   | 0 ng (n= 31), 0.09 ng (n= 48) | 0.544                          | [0.390, 0.697]        | 0.642  | 0.741        | 0.545            | [0.394, 0.696]        | 0.676  | 0.730        |
|           | 5/19/16   | 0 ng (n=20), 0.09 ng (n = 17) | 0.435                          | [0.181, 0.690]        | -0.624 | 0.781        | 0.435            | [0.196, 0.675]        | -0.654 | 0.756        |
| 0.13      | 5/30/16   | 0 ng (n= 31), 0.13 ng (n= 45) | 0.466                          | [0.315, 0.617]        | -0.509 | 0.826        | 0.448            | [0.296, 0.600]        | -0.776 | 0.662        |
|           | 6/24/16   | 0 ng (n= 5), 0.13 ng (n = 11) | 0.618                          | [0.240, 0.996]        | 0.778  | 0.68         | 0.600            | [0.214, 0.986]        | 0.651  | 0.750        |
| 0.14      | 6/24/16   | 0 ng (n= 5), 0.14 ng(n= 13)   | 0.585                          | [0.239, 0.930]        | 0.61   | 0.792        | 0.338            | [-0.009,-0.686]       | -1.167 | 0.429        |
| 0.18      | 5/19/16   | 0 ng (n=20), 0.18 ng (n= 10)  | 0.430                          | [0.138, 0.722]        | -0.588 | 0.802        | 0.37             | [0.097, 0.643]        | -1.15  | 0.441        |
|           | 4/27/16   | 0 ng (n= 13), 0.18 ng (n= 8)  | 0.212                          | [-0.058, 0.481]       | -2.309 | <b>0.038</b> | 0.183            | [-0.026, 0.391]       | -3.185 | <b>0.005</b> |
|           | 3/27/16   | 0 ng (n=19), 0.18 ng (n= 10)  | 0.363                          | [0.107, 0.62]         | -1.143 | 0.272        | 0.389            | [0.15, 0.629]         | -0.967 | 0.346        |

*Notes:* Trials with multiple doses were analyzed using nonparametric multiple comparison procedures with Dunnett-type contrasts to compare kinematics of fish exposed at each dose to the controls (05/30/16, 05/19/16, 06/24/16). Trials with single doses were tested using nonparametric Behrens-Fisher t-tests (04/27/16, 03/27/16). Significant values are in **bold red font**. See Figure 3 for the graphical representation of this table.

SLC= short latency c-bends, DomA= domoic acid, dpf= days post fertilization, RE= estimated relative effect size, Lower= lower limit of the confidence interval, Upper= upper limit of the confidence interval, Stat= test statistic, p= adjusted p-value.

**Table S17: Nonparametric analysis of long latency c-bends kinematics following exposure to different doses of domoic acid at 4 days post fertilization**

| dose (ng) | trial day | n (LLC)                       | Maximal Angular Velocity (LLC) |                       |        |              | Bend angle (LLC) |                       |        |              |
|-----------|-----------|-------------------------------|--------------------------------|-----------------------|--------|--------------|------------------|-----------------------|--------|--------------|
|           |           |                               | RE                             | 95% CI [Lower, Upper] | Stat   | p            | RE               | 95% CI [Lower, Upper] | Stat   | p            |
| 0.09      | 5/30/16   | 0 ng (n= 37), 0.09 ng (n= 45) | 0.499                          | [0.353, 0.645]        | -0.014 | 1.000        | 0.546            | [0.399, 0.693]        | 0.706  | 0.713        |
|           | 5/19/16   | 0 ng (n= 47), 0.09 ng (n= 36) | 0.592                          | [0.442, 0.741]        | 1.441  | 0.289        | 0.472            | [0.321, 0.623]        | -0.430 | 0.887        |
| 0.13      | 5/30/16   | 0 ng (n= 37), 0.13 ng (n= 47) | 0.511                          | [0.365, 0.657]        | 0.173  | 0.978        | 0.56             | [0.413, 0.706]        | 0.921  | 0.568        |
|           | 6/24/16   | 0 ng (n=18), 0.13 ng (n = 33) | 0.283                          | [0.102, 0.464]        | -2.763 | <b>0.017</b> | 0.226            | [0.059, 0.392]        | -3.809 | <b>0.001</b> |
| 0.14      | 6/24/16   | 0 ng (n=18), 0.14 ng (n= 22)  | 0.328                          | [0.123, 0.533]        | -1.93  | 0.1089       | 0.283            | [0.085, 0.481]        | -2.529 | <b>0.030</b> |
| 0.18      | 5/19/16   | 0 ng (n= 47), 0.18 ng (n= 26) | 0.394                          | [0.203, 0.585]        | -1.309 | 0.355        | 0.337            | [0.163, 0.511]        | -2.184 | 0.069        |
|           | 4/27/16   | 0 ng (n= 11), 0.18 ng (n= 11) | 0.504                          | [0.215, 0.793]        | 0.03   | 0.976        | 0.413            | [0.144, 0.682]        | -0.676 | 0.507        |
|           | 3/27/16   | 0 ng (n=14), 0.18 ng (n= 12)  | 0.482                          | [0.238,0.726]         | -0.151 | 0.881        | 0.411            | [0.171, 0.65]         | -0.769 | 0.449        |

Notes: Trials with multiple doses were analyzed using nonparametric multiple comparison procedures with Dunnett-type contrasts to compare kinematics of fish exposed at each dose to the controls (05/30/16, 05/19/16, 06/24/16). Trials with single doses were tested using nonparametric Behrens-Fisher t-tests (04/27/16, 03/27/16). Significant values are in **bold red font**. See Figure 4 for the graphical representation of this table.

LLC= long latency c-bends, DomA= domoic acid, dpf= days post fertilization, RE= estimated relative effect size, Lower= lower limit of the confidence interval, Upper= upper limit of the confidence interval, Stat= test statistic, p= adjusted p-value.

**Table S18: Nonparametric analysis of long latency c-bends kinematics in DomA-exposed larvae with or without inflated swim bladders**

| treatment          | n (LLC)                                      | Maximal Angular Velocity (LLC) |                          |        |                  | Bend angle (LLC) |                          |        |                  |
|--------------------|----------------------------------------------|--------------------------------|--------------------------|--------|------------------|------------------|--------------------------|--------|------------------|
|                    |                                              | RE                             | 95% CI<br>[Lower, Upper] | Stat   | p                | RE               | 95% CI<br>[Lower, Upper] | Stat   | p                |
| <b>DomA +SB</b>    | Control +SB (n= 147),<br>DomA +SB (n= 42)    | 0.094                          | [0.038, 0.151]           | -18.74 | <b>&lt;1 e-6</b> | 0.107            | [0.036, 0.178]           | -14.51 | <b>1.69 e-13</b> |
| <b>DomA -SB</b>    | Control +SB (n= 147),<br>DomA -SB (n= 77)    | 0.042                          | [0.004, 0.079]           | -31.74 | <b>&lt;1 e-6</b> | 0.071            | [0.021, 0.120]           | -22.81 | <b>&lt;1 e-6</b> |
| <b>Control -SB</b> | Control +SB (n= 147),<br>Control -SB (n= 17) | 0.146                          | [0.004, 0.288]           | -6.46  | <b>9.7 e-6</b>   | 0.174            | [0.005, 0.344]           | -5.02  | <b>2.49 e-4</b>  |

*Notes:* Nonparametric multiple comparison procedures with Dunnett-type contrasts were employed to compare kinematics of DomA-exposed fish with different morphological attributes (with or without swim bladders) to the control fish with swim bladders. A further comparison is made with control fish swim bladders to control fish without swim bladders. Significant values are in **bold red font**. See Figure S5A and Figure S5B for the graphical representation of the data. DomA= domoic acid, SB= swim bladder, LLC = long latency c-bends, RE= estimated relative effect size, Lower= lower limit of the confidence interval, Upper= upper limit of the confidence interval, Stat= test statistic, p= adjusted p-value.

**Table S19: Nonparametric analysis of long latency c-bends kinematics in DomA-exposed larvae without bent body axes or with bent body axes**

| treatment                    | n (LLC)                                                | Maximal Angular Velocity (LLC) |                          |        |                   | Bend angle (LLC) |                          |        |                  |
|------------------------------|--------------------------------------------------------|--------------------------------|--------------------------|--------|-------------------|------------------|--------------------------|--------|------------------|
|                              |                                                        | RE                             | 95% CI<br>[Lower, Upper] | Stat   | p                 | RE               | 95% CI<br>[Lower, Upper] | Stat   | p                |
| <b>DomA<br/>no bent</b>      | Control no bend (n= 154),<br>DomA no bend (n= 71)      | 0.085                          | [0.033, 0.136]           | -22.5  | <b>1.23 e-14</b>  | 0.102            | [0.042, 0.162]           | -18.62 | <b>3.92 e-11</b> |
| <b>DomA<br/>with bent</b>    | Control no bend (n= 154),<br>DomA with bend (n= 48)    | 0.053                          | [-0.002, 0.109]          | -22.66 | <b>&lt;1 e-16</b> | 0.082            | [0.009, 0.155]           | -16.22 | <b>6.58 e-11</b> |
| <b>Control<br/>with bent</b> | Control no bend (n= 154),<br>Control with bend (n= 10) | 0.135                          | [-0.075, 0.345]          | -4.87  | <b>1.81 e 03</b>  | 0.123            | [-0.040, 0.286]          | -6.52  | <b>1.51 e-4</b>  |

*Notes:* Nonparametric multiple comparison procedures with Dunnett-type contrasts were employed to compare kinematics of DomA-exposed fish with different morphological attributes (without a bent body axis or with a bent body axis) to the control fish without a bent body axis. A further comparison is made with control fish without a bent body axis to control fish with a bent body axis. Significant values are in **bold red font**. See Figure S5C and Figure S5D for the graphical representation of the data.

DomA= domoic acid, with bend= bent body axis, no bend= straight body axis, LLC = long latency c-bends, RE= estimated relative effect size, Lower= lower limit of the confidence interval, Upper= upper limit of the confidence interval, Stat= test statistic, p= adjusted p-value.



**Table S20: Myelin phenotype classification by day injected using confocal microscopy**

| Day injected   | Control              |                 |   |   |   | Domoic acid |                        |    |    |    |    |   |
|----------------|----------------------|-----------------|---|---|---|-------------|------------------------|----|----|----|----|---|
|                | total                | Myelin category |   |   |   | total       | Myelin category        |    |    |    |    |   |
|                |                      | 0               | 1 | 2 | 3 |             | 4                      | 0  | 1  | 2  | 3  | 4 |
| <b>1 dpf</b>   | 22<br>(15, 7)        | 22              | 0 | 0 | 0 | 0           | 31<br>(25, 6)          | 31 | 0  | 0  | 0  | 0 |
| <b>1.5 dpf</b> | 24<br>(18, 6)        | 24              | 0 | 0 | 0 | 0           | 34<br>(23, 11)         | 23 | 3  | 3  | 5  | 0 |
| <b>2 dpf</b>   | 61<br>(7, 8, 24, 22) | 61              | 0 | 0 | 0 | 0           | 106<br>(31, 32, 36, 7) | 10 | 19 | 45 | 29 | 3 |
| <b>2.5 dpf</b> | 29<br>(21, 8)        | 29              | 0 | 0 | 0 | 0           | 40<br>(33, 7)          | 5  | 9  | 20 | 5  | 1 |
| <b>4 dpf</b>   | 40<br>(6, 10, 24)    | 40              | 0 | 0 | 0 | 0           | 46<br>(14, 24, 8)      | 44 | 1  | 0  | 1  | 0 |

*Notes:* Fish were exposed to domoic acid (DomA) at a nominal dose that ranged from 0.13- 0.14 ng, which was administered at a specified developmental time period in days post fertilization (dpf). Fish were then imaged at 5 dpf. Control counterparts were exposed to vehicle saline. The total column has two rows: the first row lists the total number of fish imaged from all the repeated experimental trials, and the second row contains numbers in parentheses that include the total number of fish imaged in each experimental trial, with each trial separated by commas. Fish were also classified into different myelin categories (0- 4). A description of myelin categories can be found in Figure S2. See Figure 5 for the graphical representation of this table.

**Table S21: Trials included to assess myelin labeling, imaged using widefield epifluorescence microscopy at 5 days post fertilization (dpf)**

|                | Control                                               | DomA         |              |                                      |                   |
|----------------|-------------------------------------------------------|--------------|--------------|--------------------------------------|-------------------|
|                | 0 ng                                                  | 0.09 ng      | 0.13 ng      | 0.14 ng                              | 0.18 ng           |
| <b>1 dpf</b>   | n=24, 12, 6, 18, 64, 37                               | n=25, 16, 11 | n=6          | n= 68, 40                            | n=28, 51,15       |
| <b>1.5 dpf</b> | n= 30                                                 | -            | -            | -                                    | n= 48             |
| <b>2 dpf</b>   | n= 23, 37, 29, 19, 29, 70, 82, 80, 71, 30, 21, 80, 58 | n=51, 31, 13 | n=12, 34, 43 | n=35, 68, 75, 77, 81, 40, 24, 80, 49 | n= 26, 59, 27, 41 |
| <b>2.5 dpf</b> | n= 18, 55, 17                                         | -            | -            | n= 20, 62, 36                        | -                 |
| <b>3 dpf</b>   | n = 6, 52, 45                                         | -            | n= 12        | n= 8, 77, 36                         | -                 |
| <b>4 dpf</b>   | n= 14, 17, 18, 19, 50, 24                             | n=17, 10     | n= 10, 32    | n= 19, 27, 48, 21, 77                | -                 |

*Note:* n corresponds to the number of fish within a trial that were exposed to a given dose of domoic acid (DomA) administered at the specified developmental time period in dpf (days post fertilization). This table supports Figure 6.

**Table S22: Myelin phenotype classification by dose and day injected after fish were imaged using widefield epifluorescence microscopy at 5 days post fertilization**

| Day injected (dpf) | 0 ng            |     |   |   |   |   |   | 0.09 ng         |    |    |    |    |    |   | 0.13 ng         |    |    |    |    |   |   | 0.14 ng         |     |     |    |     |    |    | 0.18 ng         |    |    |    |    |    |   |  |
|--------------------|-----------------|-----|---|---|---|---|---|-----------------|----|----|----|----|----|---|-----------------|----|----|----|----|---|---|-----------------|-----|-----|----|-----|----|----|-----------------|----|----|----|----|----|---|--|
|                    | Myelin category |     |   |   |   |   |   | Myelin category |    |    |    |    |    |   | Myelin category |    |    |    |    |   |   | Myelin category |     |     |    |     |    |    | Myelin category |    |    |    |    |    |   |  |
|                    | tot             | 0   | 1 | 2 | 3 | 4 | 5 | tot             | 0  | 1  | 2  | 3  | 4  | 5 | tot             | 0  | 1  | 2  | 3  | 4 | 5 | tot             | 0   | 1   | 2  | 3   | 4  | 5  | tot             | 0  | 1  | 2  | 3  | 4  | 5 |  |
| <b>1</b>           | 161             | 160 | 0 | 1 | 0 | 0 | 0 | 52              | 52 | 0  | 0  | 0  | 0  | 0 | 6               | 5  | 1  | 0  | 0  | 0 | 0 | 108             | 103 | 1   | 3  | 0   | 1  | 0  | 94              | 83 | 0  | 9  | 0  | 0  | 2 |  |
| <b>1.5</b>         | 30              | 30  | 0 | 0 | 0 | 0 | 0 |                 |    |    |    |    |    |   |                 |    |    |    |    |   |   |                 |     |     |    |     |    |    |                 |    |    |    |    |    |   |  |
| <b>2</b>           | 629             | 624 | 3 | 1 | 1 | 0 | 0 | 95              | 9  | 30 | 14 | 28 | 14 | 0 | 89              | 0  | 16 | 13 | 52 | 7 | 1 | 529             | 17  | 110 | 75 | 268 | 59 | 0  | 153             | 4  | 30 | 14 | 64 | 41 | 0 |  |
| <b>2.5</b>         | 90              | 90  | 0 | 0 | 0 | 0 | 0 |                 |    |    |    |    |    |   |                 |    |    |    |    |   |   | 118             | 20  | 17  | 35 | 41  | 3  | 2  |                 |    |    |    |    |    |   |  |
| <b>3</b>           | 103             | 102 | 0 | 0 | 0 | 0 | 1 |                 |    |    |    |    |    |   | 12              | 5  | 0  | 2  | 2  | 2 | 1 | 121             | 76  | 2   | 17 | 8   | 2  | 16 |                 |    |    |    |    |    |   |  |
| <b>4</b>           | 142             | 141 | 0 | 0 | 1 | 0 | 0 | 27              | 26 | 1  | 0  | 0  | 0  | 0 | 42              | 42 | 0  | 0  | 0  | 0 | 0 | 192             | 190 | 0   | 0  | 0   | 0  | 2  |                 |    |    |    |    |    |   |  |

*Note:* Numbers correspond to the number of fish in each myelin category (0-5). Total (tot) reflects the sum of fish across all categories. A description of myelin categories can be found in Figure S2. See Figure 6 for the graphical representation of this table.  
 dpf= days post fertilization, tot = total number of fish imaged.

**Table S23: Drop-in-deviance test for incorporating day of exposure into multinomial logistic regression model**

| <b>Model number</b> | <b>Model</b>                                                 | <b>Residual df</b> | <b>Residual deviance</b> | <b>Test</b> | <b>Df</b> | <b>LR stat.</b> | <b>Pr (Chi)</b> |
|---------------------|--------------------------------------------------------------|--------------------|--------------------------|-------------|-----------|-----------------|-----------------|
| 1                   | $\beta_0 + \beta_{\text{dose}}$                              | 14180              | 5064.531                 |             | NA        | NA              | NA              |
| 2                   | $\beta_0 + \beta_{\text{dose}} + \beta_{\text{DayExposure}}$ | 14170              | 3418.670                 | 1 vs. 2     | 10        | 1645.86         | <1 e-6          |

Notes: Df= degrees of freedom, LR Stat. = Likelihood-ratio statistic, Pr (Chi)= P values from Chi squared test

**Table S24: Multinomial logistic regression model for distribution of myelin phenotypes in fish exposed to 0.14 ng of domoic acid at different periods in development (in days post fertilization)**

| Myelin category | Intercept            | 2 dpf inj           | 2.5 dpf inj         | 3 dpf inj          | 4 dpf inj        |
|-----------------|----------------------|---------------------|---------------------|--------------------|------------------|
| 1               | -4.63 (p= 3.98e-6)   | 6.50 (p= 3.76e-10)  | 4.47 (p= 2.35e-5)   | 1.00 (p= 4.19e-1)  | -9.42 (p= 0.91)  |
| 2               | -3.54 (p= 1.56e-9)   | 5.02 (p= 6.66e-15)  | 4.10 (p= 2.83e-10)  | 2.04 (p= 1.55e-3)  | -19.65 (p< e-16) |
| 3               | -31.83 (p= 7.00e-11) | 34.58 (p= 1.44e-12) | 32.54 (p= 2.71e-11) | 29.57 (p= 1.46e-9) | 20.19 (p= 0.30)  |
| 4               | -4.64 (p= 4.00e-6)   | 5.88 (p= 1.68e-8)   | 2.74 (p= 2.04e-2)   | 1.00 (p= 4.19e-1)  | -7.74 (p= 0.83)  |
| 5               | -31.01 (p< e-16)     | 11.57 (p< e-16)     | 28.70 (p< e-16)     | 29.45 (p< e -16)   | 26.45 (p< e-16)  |

*Note:* The reference condition for the analysis is 1 dpf injected fish with no myelin deficits (myelin category 0). A description of myelin categories can be found in Figure S2. Coefficients are listed along with p-values in parentheses. See Figure 6 for the graphical representation of this table.

DomA = domoic acid, dpf= days post fertilization

**Table S25: Trials included to assess myelin labeling, imaged using widefield epifluorescence microscopy at 6 days post fertilization**

| Day injected | Control       | DomA          |         |           |
|--------------|---------------|---------------|---------|-----------|
|              | 0 ng          | 0.09 ng       | 0.13 ng | 0.18 ng   |
| 1 dpf        | n= 27, 10, 32 | n= 22, 36     | n= 36   | n= 25, 14 |
| 2 dpf        | n= 22, 15     | n= 52         | n= 41   | -         |
| 4 dpf        | n= 31, 24, 34 | n= 35, 13, 41 | n= 37   | -         |

*Note:* n corresponds to the number of fish within a trial that were exposed to a given dose of domoic acid (DomA) administered at the specified developmental time period in days post fertilization (dpf). This table supports Figure 7.

**Table S26: Myelin phenotype classification by dose and day injected after fish were imaged using widefield epifluorescence microscopy at 6 days post fertilization**

| Day injected<br>(dpf) | 0 ng            |    |   |   |   |   |   | 0.09 ng         |    |    |    |   |   |   | 0.13 ng         |    |    |   |    |   |   | 0.18 ng         |    |   |   |   |   |   |
|-----------------------|-----------------|----|---|---|---|---|---|-----------------|----|----|----|---|---|---|-----------------|----|----|---|----|---|---|-----------------|----|---|---|---|---|---|
|                       | Myelin category |    |   |   |   |   |   | Myelin category |    |    |    |   |   |   | Myelin category |    |    |   |    |   |   | Myelin category |    |   |   |   |   |   |
|                       | <i>tot</i>      | 0  | 1 | 2 | 3 | 4 | 5 | <i>tot</i>      | 0  | 1  | 2  | 3 | 4 | 5 | <i>tot</i>      | 0  | 1  | 2 | 3  | 4 | 5 | <i>tot</i>      | 0  | 1 | 2 | 3 | 4 | 5 |
| 1                     | 69              | 69 | 0 | 0 | 0 | 0 | 0 | 58              | 58 | 0  | 0  | 0 | 0 | 0 | 36              | 34 | 2  | 0 | 0  | 0 | 0 | 39              | 32 | 1 | 0 | 0 | 0 | 6 |
| 2                     | 37              | 37 | 0 | 0 | 0 | 0 | 0 | 52              | 13 | 18 | 14 | 5 | 2 | 0 | 41              | 8  | 14 | 7 | 11 | 1 | 0 |                 |    |   |   |   |   |   |
| 4                     | 89              | 88 | 0 | 1 | 0 | 0 | 0 | 89              | 88 | 1  | 0  | 0 | 0 | 0 | 37              | 36 | 1  | 0 | 0  | 0 | 0 |                 |    |   |   |   |   |   |

*Note:* Numbers correspond to the number of fish in each myelin category (0-5). Total (Tot) reflects the sum of fish across all categories. A description of myelin categories can be found in Figure S2. See Figure 7A for the graphical representation of this table.

dpf= days post fertilization, tot = total number of fish imaged.

**Table S27: Trials included to assess myelin labeling, imaged using widefield epifluorescence microscopy at 7 days post fertilization**

| Day injected | Control         |         | DomA    |         |              |
|--------------|-----------------|---------|---------|---------|--------------|
|              | 0 ng            | 0.09 ng | 0.13 ng | 0.14 ng | 0.18 ng      |
| <b>1 dpf</b> | n=23            | n= 18   | n=17    | -       | -            |
| <b>2 dpf</b> | n=14, 10, 2, 28 | n=18    | n=19    | n=39    | n=39, 19, 21 |
| <b>4 dpf</b> | n=21, 16        | n=19    | n=20    | n=25    | -            |

*Note:* n corresponds to the number of fish within a trial that were exposed to a given dose of domoic acid (DomA) administered at the specified developmental time period. See Figure 7B for the graphical representation of this table.



**Table S28: Myelin phenotype classification by domoic acid dose and day injected after fish were imaged using widefield epifluorescence microscopy at 7 days post fertilization**

| Day injected (dcpf) | 0 ng            |    |   |   |   |   |   | 0.09 ng         |    |   |   |   |   |   | 0.13 ng         |    |   |   |    |   |   | 0.14 ng         |    |    |    |   |   |   | 0.18 ng         |   |    |   |    |   |   |  |  |  |  |  |  |  |  |  |  |  |  |
|---------------------|-----------------|----|---|---|---|---|---|-----------------|----|---|---|---|---|---|-----------------|----|---|---|----|---|---|-----------------|----|----|----|---|---|---|-----------------|---|----|---|----|---|---|--|--|--|--|--|--|--|--|--|--|--|--|
|                     | Myelin category |    |   |   |   |   |   | Myelin category |    |   |   |   |   |   | Myelin category |    |   |   |    |   |   | Myelin category |    |    |    |   |   |   | Myelin category |   |    |   |    |   |   |  |  |  |  |  |  |  |  |  |  |  |  |
|                     | tot             | 0  | 1 | 2 | 3 | 4 | 5 | tot             | 0  | 1 | 2 | 3 | 4 | 5 | tot             | 0  | 1 | 2 | 3  | 4 | 5 | tot             | 0  | 1  | 2  | 3 | 4 | 5 | tot             | 0 | 1  | 2 | 3  | 4 | 5 |  |  |  |  |  |  |  |  |  |  |  |  |
| 1                   | 23              | 23 | 0 | 0 | 0 | 0 | 0 | 18              | 18 | 0 | 0 | 0 | 0 | 0 | 17              | 17 | 0 | 0 | 0  | 0 | 0 |                 |    |    |    |   |   |   |                 |   |    |   |    |   |   |  |  |  |  |  |  |  |  |  |  |  |  |
| 2                   | 54              | 51 | 3 | 0 | 0 | 0 | 0 | 18              | 3  | 9 | 3 | 3 | 0 | 0 | 19              | 1  | 6 | 2 | 10 | 0 | 0 | 39              | 3  | 15 | 15 | 6 | 0 | 0 | 40              | 1 | 13 | 7 | 16 | 3 | 0 |  |  |  |  |  |  |  |  |  |  |  |  |
| 4                   | 37              | 37 | 0 | 0 | 0 | 0 | 0 | 19              | 19 | 0 | 0 | 0 | 0 | 0 | 20              | 20 | 0 | 0 | 0  | 0 | 0 | 25              | 25 | 0  | 0  | 0 | 0 | 0 |                 |   |    |   |    |   |   |  |  |  |  |  |  |  |  |  |  |  |  |

*Note:* Numbers correspond to the number of fish in each myelin category (0-5). Total (Tot) reflects the sum of fish across all categories. A description of myelin categories can be found in Figure S2. See Figure 7B for the graphical representation of this table.  
dcpf= days post fertilization, tot = total number of fish imaged.

**Table S29: Multinomial logistic regression model for distribution of myelin phenotypes in fish exposed to different doses of domoic acid at 2 days post fertilization (dpf) and imaged at 5, 6, and 7 dpf**

| myelin category | 5 dpf imaged        |                    | 6 dpf imaged            |                         | 7 dpf imaged           |                        |
|-----------------|---------------------|--------------------|-------------------------|-------------------------|------------------------|------------------------|
|                 | Intercept           | DomA (ng)          | Intercept               | DomA (ng)               | Intercept              | DomA (ng)              |
| 1               | -4.85<br>(p <e-16)  | 52.46<br>(p <e-16) | -3.82<br>(p =2.04 e -5) | 40.21<br>(p =6.73 e -6) | -2.77<br>(p =1.54e-7)  | 34.12<br>(p =7.37e-11) |
| 2               | -5.49<br>(p <e-16)  | 53.64<br>(p <e-16) | -3.66<br>(p =3.52 e -5) | 34.72<br>(p =9.2 e-5)   | -4.42<br>(p =1.34e-6)  | 42.15<br>(p =1.02e-8)  |
| 3               | -5.06<br>(p <e-16)  | 59.56<br>(p <e-16) | -6.79<br>(p =7.88 e -5) | 60.37<br>(p =7.87 e-5)  | -4.96<br>(p =5.93e-7)  | 47.74<br>(p =8.54e-10) |
| 4               | -7.73<br>(p <e-16)  | 69.59<br>(p <e-16) | -5.59<br>(p =8.96 e -3) | 34.54<br>(p =0.087)     | -15.46<br>(p =2.64e-2) | 96.52<br>(p =1.61e-2)  |
| 5               | -9.09<br>(p =0.005) | 44.81<br>(p =0.06) | NA                      | NA                      | NA                     | NA                     |

*Notes:* Domoic acid (DomA) is modeled as a continuous factor from fish exposed to the following nominal DomA doses: 0.09, 0.13, and 0.14 ng. Coefficients were listed along with p-values in parentheses. See Figure 6 (5 dpf imaged), Figure 7A (6 dpf imaged), and Figure 7B (7 dpf imaged) for the graphical representations of this table.

**Table S30: Genes associated with the enriched GO term: biological processes**

| GO term                      | term ID    | pvalue   | ENSEMBL_gene       | gene name     | logFC  |
|------------------------------|------------|----------|--------------------|---------------|--------|
| Protein depolymerization     | GO:0051261 | 3.54E-02 | ENSDARG00000030106 | <i>stmn4</i>  | 0.507  |
| Microtubule depolymerization | GO:0007019 | 8.71E-03 | ENSDARG00000038465 | <i>stmn3</i>  | -0.612 |
|                              |            |          | ENSDARG00000043932 | <i>stmn4l</i> | 0.433  |

*Notes:* Genes associated with the GO term are listed by ENSEMBL gene ID and common gene name. log fold change (FC) is also indicated. Functional enrichment analysis was done using gprofiler (version r1750\_e91\_eg38), which employs a hypergeometric test (Fisher's exact test) with a multiple testing correction using the g:SCS threshold. See Figure 9C for the graphical representation of this table.

**Table S31: Human Phenotype Ontology associated with differentially expressed genes at 3 days post fertilization**

| Human phenology phenotype                         | Term ID    | pvalue   | ENSDARG0                   | ENSDARG0                   | ENSDARG0                 | ENSDARG0                   | ENSDARG0                    |
|---------------------------------------------------|------------|----------|----------------------------|----------------------------|--------------------------|----------------------------|-----------------------------|
|                                                   |            |          | 0000012426<br><i>neflb</i> | 0000057568<br><i>nefla</i> | 0000038609<br><i>mpz</i> | 0000039522<br><i>tubb2</i> | 0000018997<br><i>cplx2l</i> |
| Peripheral axonal degeneration                    | HP:0000764 | 2.12 e-2 |                            |                            |                          |                            |                             |
| Myelin outfoldings                                | HP:0004336 | 4.50 e-4 |                            |                            |                          |                            |                             |
| Peripheral hypermyelination                       | HP:0030173 | 7.85 e-4 |                            |                            |                          |                            |                             |
| Segmental peripheral demyelination/ remyelination | HP:0003481 | 8.06 e-3 |                            |                            |                          |                            |                             |
| Clusters of axonal regeneration                   | HP:0007233 | 8.23 e-3 |                            |                            |                          |                            |                             |
| Ulnar claw                                        | HP:0001178 | 3.68 e-3 |                            |                            |                          |                            |                             |
| Hypotrophy of small hand muscles                  | HP:0006006 | 4.92 e-2 |                            |                            |                          |                            |                             |
| Ectrodactyly                                      | HP:0100257 | 4.37 e-2 |                            |                            |                          |                            |                             |
| Split hand                                        | HP:0001171 | 3.89 e-2 |                            |                            |                          |                            |                             |

*Notes:* Genes associated with each Human Phenotype Ontology are listed by ENSEMBL gene ID and common gene name. Shading indicates which of the listed genes are associated with each phenotype. Functional enrichment analysis was done using gprofiler (version r1750\_e91\_eg38), which employs a hypergeometric test (Fisher's exact test) with a multiple testing correction using the g:SCS threshold. See Figure 9C and Figure 10 for the graphical representations of this table.

**Video S1: Acoustic startle response**

A 16 well plate containing control fish in the top two rows and domoic acid (DomA)-exposed fish (2 dpf injected, 0.14ng) in the bottom two rows. Fish were subjected to an auditory/vibrational stimulus, while their responses were recorded at 1000 frames per second.

**Video S2: Time-lapse video of *Tg(sox10:RFP) x Tg(nkx2.2a:mEGFP)* control fish**

Time-lapse sequence of the spinal cord of a control fish injected at 2 days post fertilization (dpf) taken from 2.5- 3 dpf (12.5 hours in total, with a 9 minute imaging interval). RFP labels cell bodies of cells from the oligodendrocyte lineage. mEGFP expression labels oligodendrocyte membrane processes that wrap axons and become elongated, nascent myelin sheaths.

**Video S3: Time-lapse video of *Tg(sox10:RFP) x Tg(nkx2.2a:mEGFP)* DomA exposed fish**

Time-lapse sequence of the spinal cord of a domoic acid (DomA)-exposed fish (0.14 ng) injected at 2 dpf taken from 2.5- 3 dpf (12.5 hours in total, with a 9 minute imaging interval). RFP labels cell bodies of cells from the oligodendrocyte lineage. mEGFP expression labels oligodendrocyte membrane processes that form unusual circular membranes.

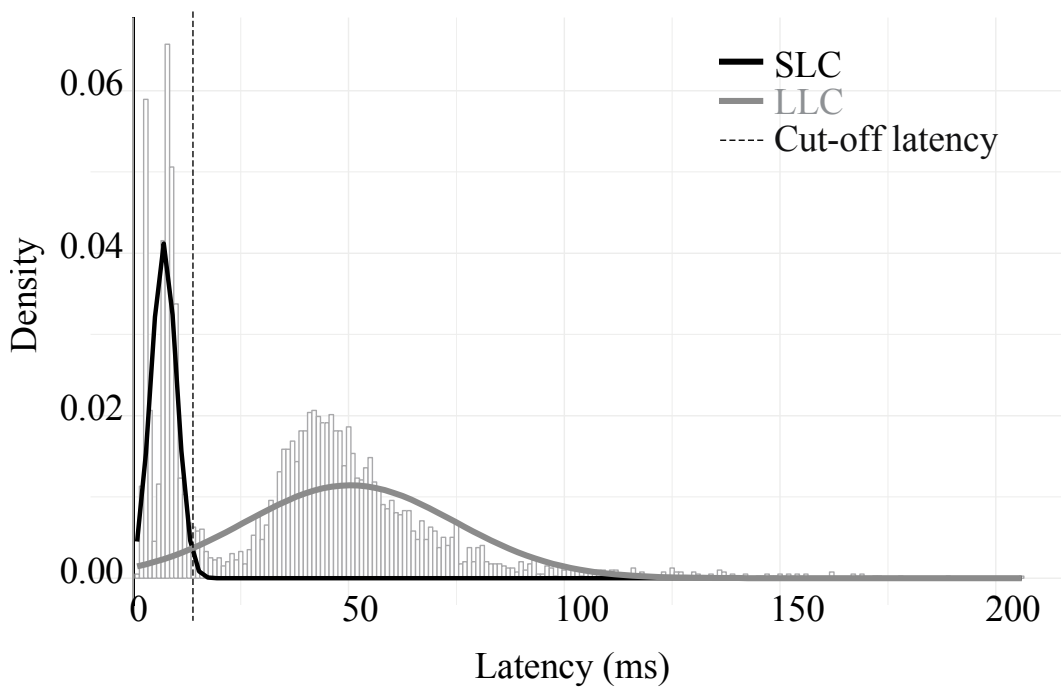

**Figure S1: Startle behavioral classification**

Density histogram of the latency distribution for control fish. Overlaid are two Gaussian curves that were fit to the data. The black curve represents the Short latency c-bend (SLC) startle response distribution, and gray curve represents the Long latency c-bend (LLC) startle response distribution. The dashed black vertical line at 13 milliseconds represents the cut-off by which there is a greater than 50% probability of a given data point belonging to either modeled distribution.

| Sample confocal microscopy images                                                  | Sample widefield microscopy images                                                  | Severity Classification (number) - Description                                                                                                                                                                                                  |
|------------------------------------------------------------------------------------|-------------------------------------------------------------------------------------|-------------------------------------------------------------------------------------------------------------------------------------------------------------------------------------------------------------------------------------------------|
| 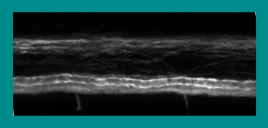  |    | (0) Normal phenotype — Dorsal and ventral regions of the spinal cord had labeled myelin sheaths. The myelin sheath surrounding the Mauthner axon was visible.                                                                                   |
|   |    | (1) Myelin sheaths were present but disorganized. In some cases, myelinated axons that were normally found ventrally were located more dorsally. In others, the myelinated axons terminated prematurely with distal ends located more dorsally. |
|   |    | (2) Myelin was labeled in both the dorsal and ventral regions of the spinal cord, but there are some noticeable deficits. While the ventral spinal cord was labeled, it had noticeably less myelin labeled compared to controls.                |
|   |    | (3) The loss of labeled myelin in the ventral spinal cord resulted in large, observable gaps between myelinated axons.                                                                                                                          |
|  |   | (4) Myelin sheaths were essentially nonexistent in the ventral spinal cord. Instead, numerous hollow circular profiles were present both in the ventral and dorsal spinal cord.                                                                 |
|                                                                                    |  | (5) There were visible sloughed off portions of myelin which were defined by labeled portions of myelin which had a 'rough looking appearance' and were separated from the thin, elongated sheaths                                              |

**Figure S2: Qualitative myelin phenotype scoring**

Myelinated axonal tracks in the dorsal and ventral spinal cord. Fish were blindly classified into 6 categories (0-5) based on the severity in the myelin defect. Representative confocal and widefield fluorescence microscopy images are shown for each severity classification.

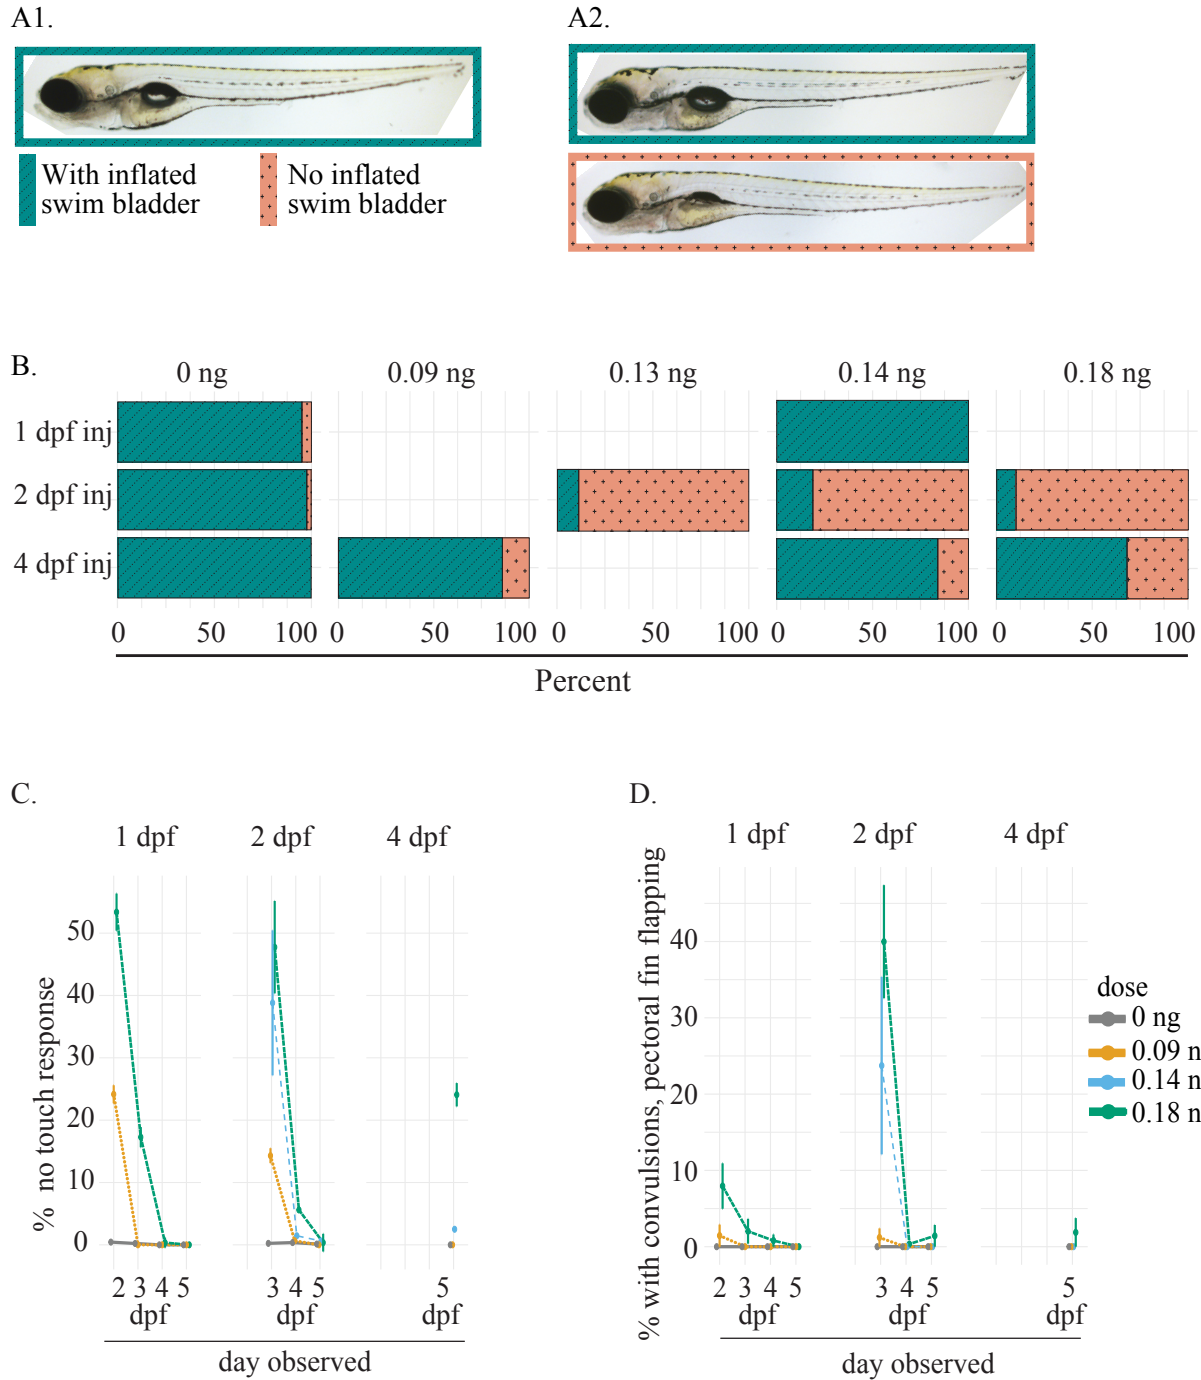

**Figure S3: Acute neurotoxic and morphological phenotypes associated with developmental exposure to domoic acid**

(A1) Representative brightfield image of control larvae with an inflated swim bladder.

(A2) Representative brightfield image of domoic acid (DomA)-exposed larvae with an inflated swim bladder (teal), and without an inflated swim bladder (peach).



**(B)** Presence or absence of the inflated swim bladder was determined by treatment, dose, and time of exposure. (See also Table S2.)

**(C)** Fish were exposed to different doses of DomA (0.09 ng- 0.18 ng) at 1, 2, and 4 dpf. Within individual trials, the percentage of embryos with touch response deficits were recorded one day post-exposure until 5 dpf. Points represent the mean prevalence of no touch responses from multiple repeated trials  $\pm$  standard error (SE).

**(D)** The same fish population observed in Figure S3C were also monitored for the presence of convulsions or pectoral fin flapping from one day post-exposure until 5 dpf.

Statistical significance in **(C)** and **(D)** was determined using generalized estimating equations (for 1 and 2 dpf injected fish), or using a generalized linear model with a quasibinomial link function (for 4 dpf injected fish) (see also Table S5-S9).

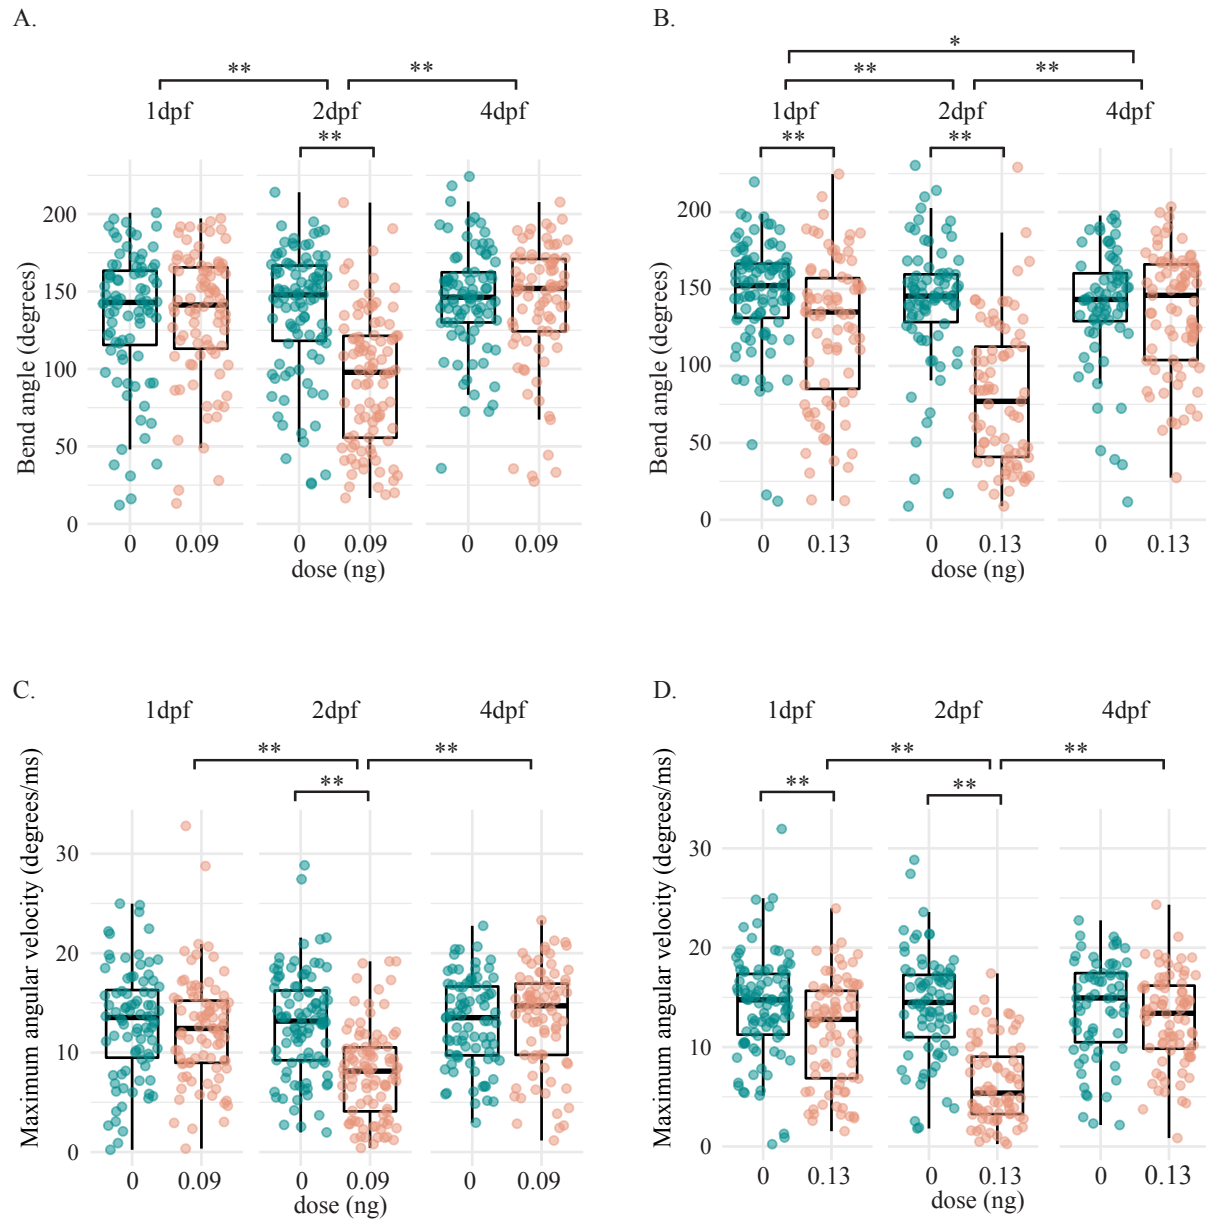

**Figure S4: Startle kinematics comparisons among zebrafish exposed at 1, 2 and 4 dpf**

(A) Bend angles during long latency c-bend (LLC) startle responses in fish exposed during different exposure days (1, 2 and 4 dpf) to the nominal dose of 0.09 ng of domoic acid (DomA) and (B) to a dose that ranged from 0.126- 0.144 (labelled as 0.13ng of DomA). (C) Maximal angular velocity during LLC startle responses in fish exposed during different exposure days to 0.09 ng of DomA and to (D) 0.13ng of DomA. Each point represents the median kinematic response of an individual larva to multiple identical stimuli. Boxplots show the group medians, upper 75% quantiles, and lower 25% quantiles. For the analysis of bend angles (S4A and S4B),

statistical significance was determined using Aligned Ranked Transformed analysis of variance (ANOVA) tests followed by difference-of-difference contrasts and Mann-Whitney U tests with the Holm-Bonferroni method to correct for multiple comparisons. For the analysis of maximal angular velocities (S4C and S4D), statistical significance was determined using two-way analysis of variance followed by Tukey's post-hoc tests (\*  $p < 0.05$ , \*\*= $p < 0.01$ ).

Figure supplement: Supplemental video 1 is a sample startle response.

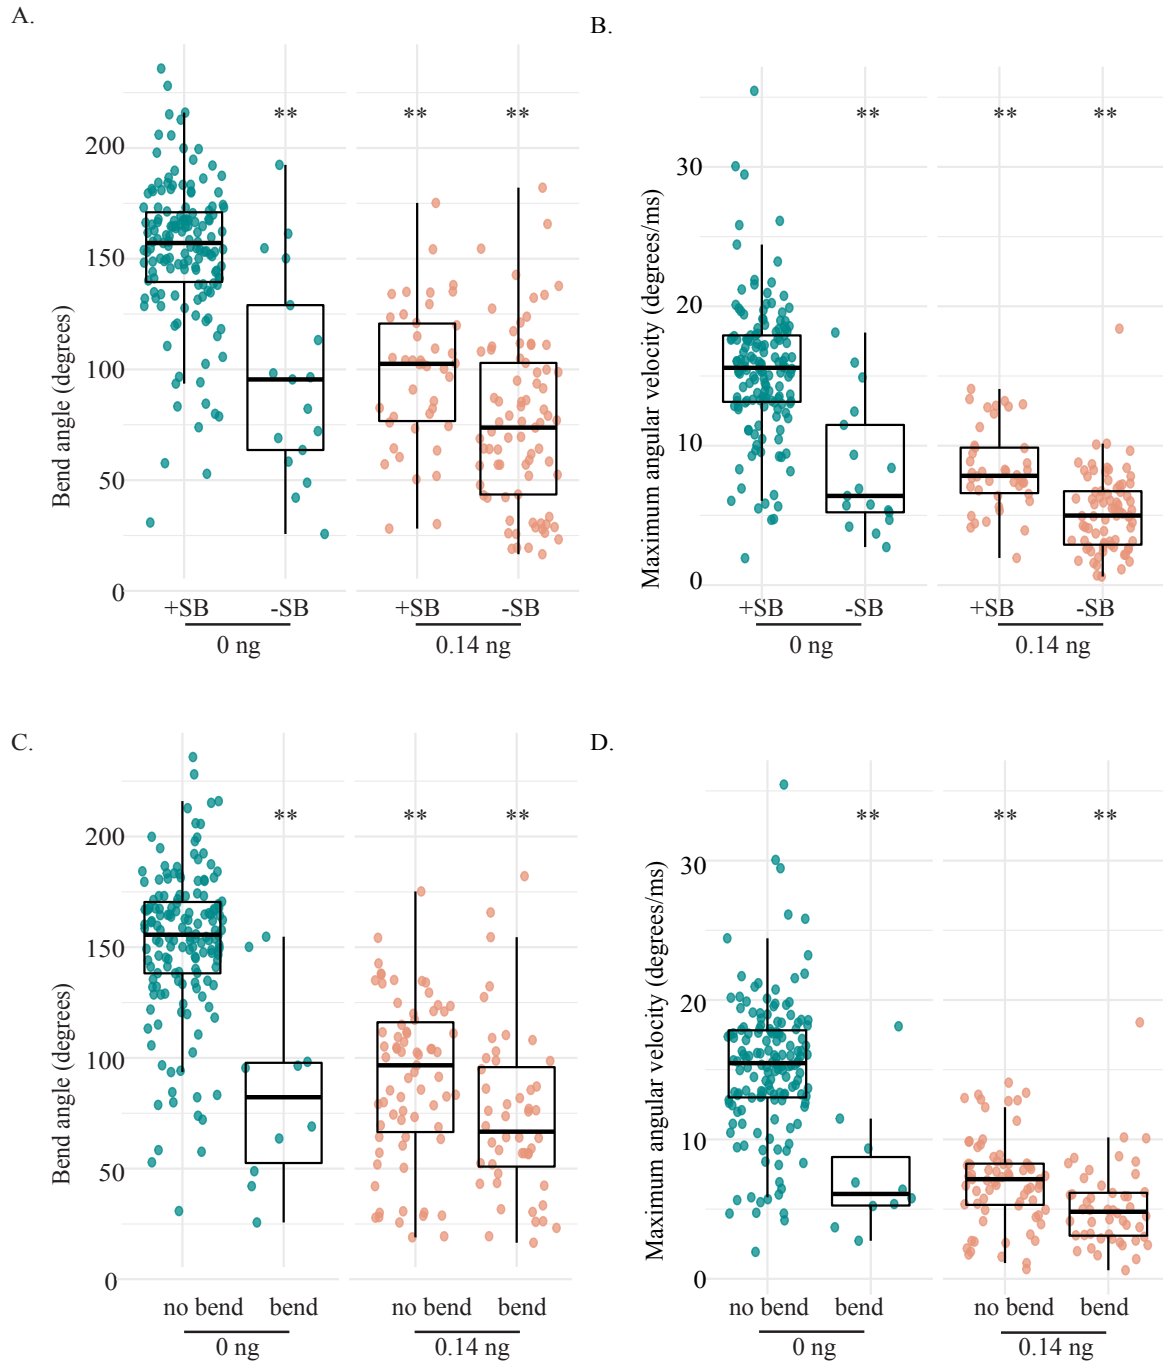

**Figure S5: Startle kinematics comparisons with zebrafish exposed at 2 dpf with differing morphological attributes**

Bend angles (A) and maximal angular velocities (B) during long latency c-bends (LLC) startles were characterized in control and DomA-exposed fish which either had an inflated swim bladder (+SB) or did not (-SB). Bend angles (C) and maximal angular velocities (D) during long latency c-bends (LLC) startles were also characterized in control and DomA-exposed fish which had a

straight body axis (no bend) or had a bent body axis (bend). Fish were exposed at 2 dpf to either vehicle saline (0 ng) or DomA (0.14ng). Statistical significance was determined using nonparametric multiple comparison procedures with Dunnett-type contrasts. All treatment groups were compared to controls with “control-like” phenotypes defined as: controls with inflated swim bladders (+SB) (for A and B) or controls with straight body axes (no bend) (for C and D) (\*\*p <0.001). Table S18 and S19 contain the results for the statistical analysis.

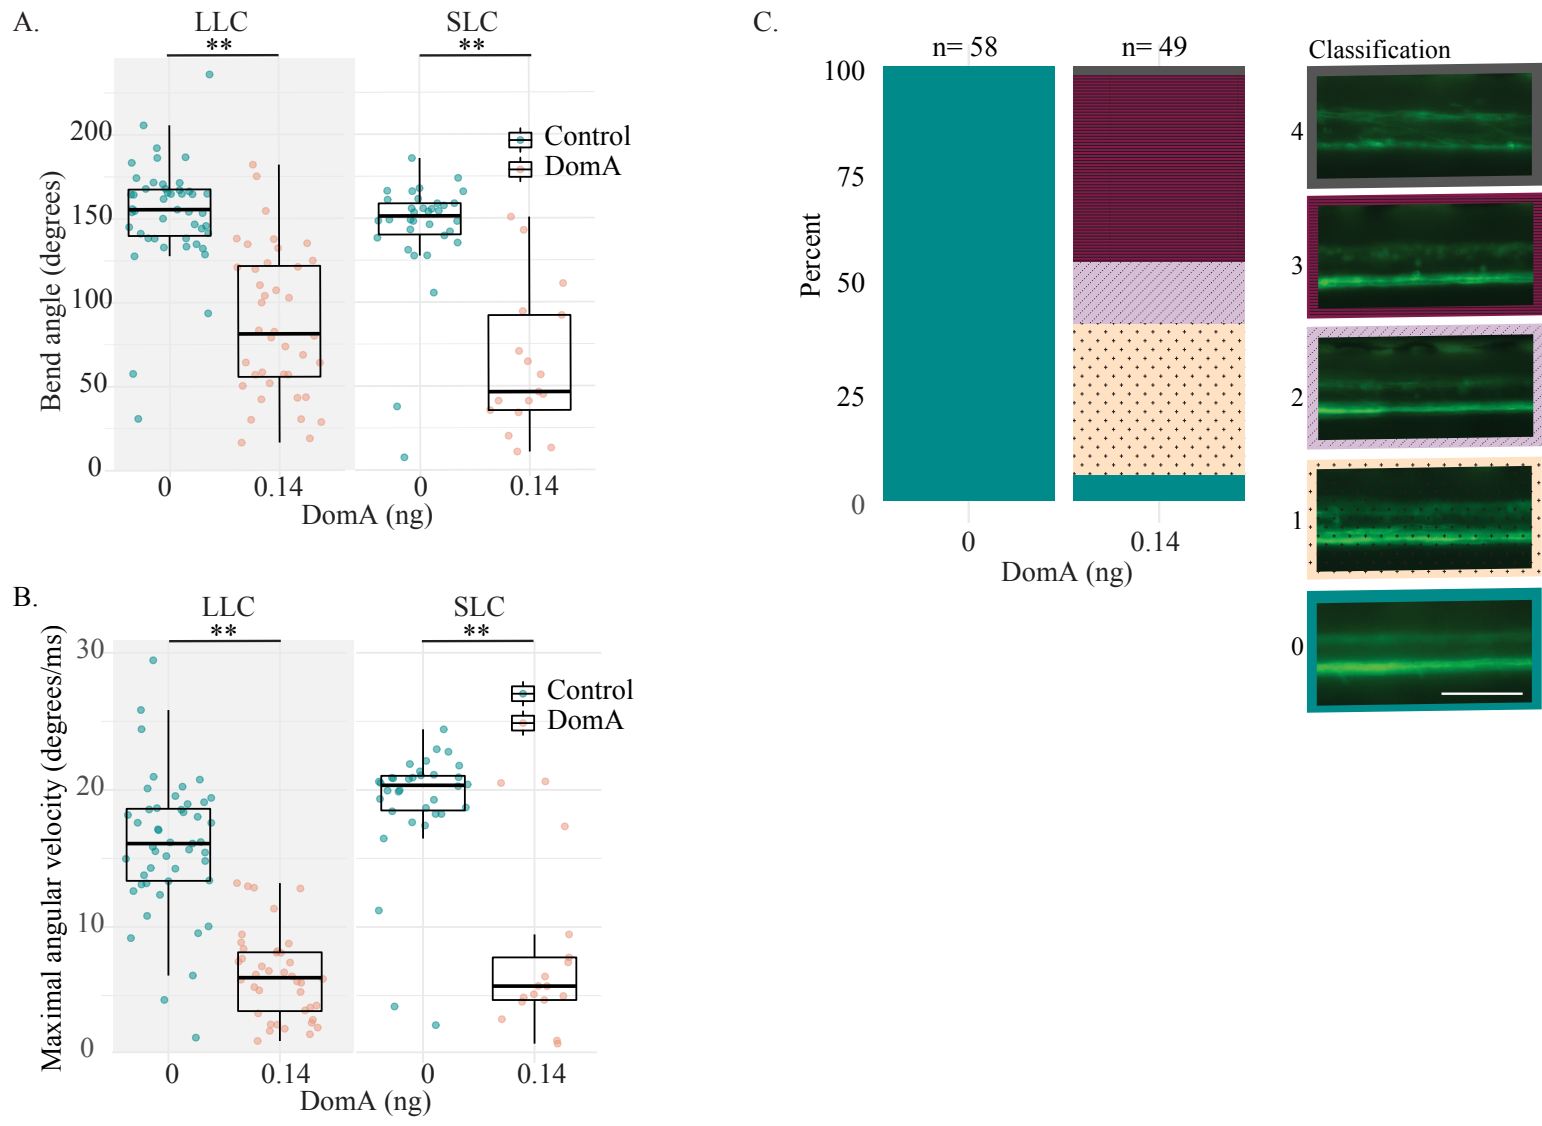

**Figure S6: Startle kinematics and myelin sheath imaging in fish used for RNASeq**

Tanks of 3 adult fish (2 females, 1 male) of *Tg(mbp:EGFP-CAAX)* background were bred and the embryos exposed to domoic acid (DomA) (0.14 ng) or vehicle at 2 dpf. Myelin sheath labeling was assessed at 5 dpf and startle response was assessed at 7 days post fertilization (dpf) prior to RNA sequencing.

Fish were exposed to 0.14 ng of domoic acid (DomA) at 2 day post fertilization (dpf). Long latency (LLC) and short latency (SLC) c-bends startle responses were characterized by bend angle (**A**) and maximal angular velocity (**B**). Each point represents the median of up to 7 responses for an individual fish. Boxplots show the group medians, upper 75% quantiles, and lower 25% quantiles.

Significance was determined using Behrens-Fisher t-tests. Asterisks represent statistical significance of kinematics of DomA-exposed fish compared with controls (\*\*  $p < 0.001$ ). (**C**) Distribution of myelin phenotypes in control (0 ng) and DomA-treated fish exposed at 2 dpf and imaged at 5 dpf using widefield epifluorescence microscopy. Images were blindly classified into 6 categories based on severity of the observed myelin phenotype. The scoring was as described in detail in Figure S2. Briefly, the classification was: (0) normal phenotype, (1) myelin sheaths present but disorganized, (2) myelin with noticeable deficits, (3) myelin gaps in ventral spinal cord, (4) myelin sheaths lacking in ventral spinal cord, (5) visible sloughed myelin. Numbers above denote the total number of fish per treatment group. Boxplots show the group medians, upper 75% quantiles, and lower 25% quantiles.

(\*\* =  $p < 0.001$ ). ; Scale bar = 100  $\mu\text{m}$
