# Supplementary material
Source: PubMed Central journal article supplement (PMC7641300)
Supplement: ehp6652.smcontents.508.pdf [file ehp6652.smcontents.508.pdf]

**Note to readers with disabilities:** *EHP* strives to ensure that all journal content is accessible to all readers. However, some figures and Supplemental Material published in *EHP* articles may not conform to [508 standards](#) due to the complexity of the information being presented. If you need assistance accessing journal content, please contact [ehp508@niehs.nih.gov](mailto:ehp508@niehs.nih.gov). Our staff will work with you to assess and meet your accessibility needs within 3 working days.

### **Supplemental Material**

#### **Developmental Neurotoxicity of the Harmful Algal Bloom Toxin Domoic Acid: Cellular and Molecular Mechanisms Underlying Altered Behavior in the Zebrafish Model**

Jennifer M. Panlilio, Neelakanteswar Aluru, and Mark E. Hahn

#### **Table of Contents**

##### **Supplemental Material: Reagents and Sources**

##### **Supplemental Material: Equipment, Sources, and Settings**

**Table S1.** Study-specific metrics.

**Table S2.** Swim bladder analysis: percent of fish with inflated swim bladders by day injected and dose.

**Table S3.** Opaque brains in *Tg(mbp:EGFP-CAAX)* larvae exposed to domoic acid by intravenous injection.

**Table S4.** Mortality in *Tg(mbp:EGFP-CAAX)* larvae exposed to domoic acid by intravenous injection.

**Table S5.** Acute neurological phenotypes following developmental exposures to domoic acid at 1 dpf.

**Table S6.** Acute neurological phenotypes following developmental exposures to domoic acid at 2 dpf.

**Table S7.** Acute neurological phenotypes following developmental exposures to domoic acid at 4 dpf.

**Table S8.** Results from Generalized Estimating Equations (GEE) models assessing the effect of dose and day post-exposure on the prevalence of the lack of touch responses in fish exposed at 1 and 2 days post fertilization.

**Table S9.** Results from Generalized Estimating Equations (GEE) models assessing the effect of dose and day post-exposure on the prevalence of convulsions or pectoral fin flapping in fish exposed at 1 and 2 days post fertilization.

**Table S10.** Post-hoc pairwise Dunnett comparisons following binomial modeling of percent responsiveness in startle behavior.

**Table S11.** Nonparametric analysis of short latency c-bend startle kinematics following exposure to different doses of domoic acid at 2 days post fertilization.

**Table S12.** Nonparametric analysis of long latency c-bend startle kinematics following exposure to different doses of domoic acid at 2 days post fertilization.

**Table S13.** Median and Interquartile range for startle kinematic parameters of fish exposed to different doses of domoic acid at 2 dpf.

**Table S14.** Nonparametric analysis of short latency c-bend startle kinematics following exposure to different doses of domoic acid at 1 day post fertilization.

**Table S15.** Nonparametric analysis of long latency c-bend startle kinematics following exposure to different doses of domoic acid at 1 day post fertilization.

**Table S16.** Nonparametric analysis of short latency c-bends kinematics following exposure to different doses of domoic acid at 4 days post fertilization.

**Table S17.** Nonparametric analysis of long latency c-bends kinematics following exposure to different doses of domoic acid at 4 days post fertilization.

**Table S18.** Nonparametric analysis of long latency c-bends kinematics in DomA-exposed larvae with or without inflated swim bladders.

**Table S19.** Nonparametric analysis of long latency c-bends kinematics in DomA-exposed larvae without bent body axes or with bent body axes.

**Table S20.** Myelin phenotype classification by day injected using confocal microscopy.

**Table S21.** Trials included to assess myelin labeling, imaged using widefield epifluorescence microscopy at 5 days post fertilization (dpf).

**Table S22.** Myelin phenotype classification by dose and day injected after fish were imaged using widefield epifluorescence microscopy at 5 days post fertilization.

**Table S23.** Drop-in-deviance test for incorporating day of exposure into multinomial logistic regression model.

**Table S24.** Multinomial logistic regression model for distribution of myelin phenotypes in fish exposed to 0.14 ng of domoic acid at different periods in development (in days post fertilization).

**Table S25.** Trials included to assess myelin labeling, imaged using widefield epifluorescence microscopy at 6 days post fertilization.

**Table S26.** Myelin phenotype classification by dose and day injected after fish were imaged using widefield epifluorescence microscopy at 6 days post fertilization.

**Table S27.** Trials included to assess myelin labeling, imaged using widefield epifluorescence microscopy at 7 days post fertilization.

**Table S28.** Myelin phenotype classification by domoic acid dose and day injected after fish were imaged using widefield epifluorescence microscopy at 7 days post fertilization.

**Table S29.** Multinomial logistic regression model for distribution of myelin phenotypes in fish exposed to different doses of domoic acid at 2 days post fertilization (dpf) and imaged at 5, 6, and 7 dpf.

**Table S30.** Genes associated with the enriched GO term: biological processes.

**Table S31.** Human Phenotype Ontology associated with differentially expressed genes at 3 days post fertilization.

**Video S1:** Acoustic startle response.

**Video S2:** Time-lapse video of *Tg(sox10:RFP)* x *Tg(nkx2.2a:mEGFP)* control fish.

**Video S3:** Time-lapse video of *Tg(sox10:RFP)* x *Tg(nkx2.2a:mEGFP)* DomA exposed fish.

**Figure S1.** Startle behavioral classification.

**Figure S2.** Qualitative myelin phenotype scoring.

**Figure S3.** Acute neurotoxic and morphological phenotypes associated with developmental exposure to domoic acid.

**Figure S4.** Startle kinematics comparisons among zebrafish exposed at 1, 2 and 4 dpf.

**Figure S5.** Startle kinematics comparisons with zebrafish exposed at 2 dpf with differing morphological attributes.

**Figure S6.** Startle kinematics and myelin sheath imaging in fish used for RNASeq.

**Additional File-** Excel and Code Document

**Additional File-** Video Document
